# Supplementary material for: Binding modes and pathway of RHPS4 to human telomeric G-quadruplex and duplex DNA probed by all-atom molecular dynamics simulations with explicit solvent
Source: Royal Society of Chemistry journal article supplement (doi:10.1039/c7cp03313c), 2017-01-01
Supplement: c7cp03313c2.pdf [file c7cp03313c2.pdf]

### Supporting Information

## Binding Modes and Pathway of RHPS4 to Telomeric G-Quadruplex and Duplex DNA Probed by All-Atom Molecular Dynamics Simulations with Explicit Solvent

by Kelly Mulholland, Farzana Siddiquei and Chun Wu

**Table S1.** Summary of RHPS4 use in treating various cancers

| Cell line                  | Target                 | Disease                       | Reference |
|----------------------------|------------------------|-------------------------------|-----------|
| U251MG, U87MG, T67 and T70 | Telomeric G-quadruplex | Astrocytoma                   | 1         |
| DAOY                       | Telomeric G-quadruplex | Medulloblastoma               | 2         |
| PFSK-1 CNS PNET            | Telomeric G-quadruplex | CNS primitive neuroectodermal | 2         |
| U87, KNS42                 | Telomeric G-quadruplex | Glioblastoma                  | 2         |
| Res196                     | Telomeric G-quadruplex | Ependymoma                    | 2         |
| C6                         | Telomeric G-quadruplex | Glioma                        | 2         |
| HCT116                     | Telomeric G-quadruplex | Colorectal                    | 3         |

1. Berardinelli, F.; Siteni, S.; Tanzarella, C.; Stevens, M. F.; Sgura, A.; Antocchia, A., The G-quadruplex-stabilising agent RHPS4 induces telomeric dysfunction and enhances radiosensitivity in glioblastoma cells. *DNA Repair* **2015**, 25, 104-115
2. Lagah, S.; Tan, I. L.; Radhakrishnan, P.; Hirst, R. A.; Ward, J. H.; O'Callaghan, C.; Smith, S. J.; Stevens, M. F. G.; Grundy, R. G.; Rahman, R., RHPS4 G-Quadruplex Ligand Induces Anti-Proliferative Effects in Brain Tumor Cells. *Plos One* **2014**, 9
3. Johnson, L. A.; Byrne, H. M.; Willis, A. E.; Laughton, C. A., An integrative biological approach to the analysis of tissue culture data: application to the antitumour agent RHPS4. *Integrative Biology* **2011**, 3, 843-849

**Figure S2.** Initial structures of the simulation systems with unbound RHPS4: duplex DNA (A), parallel quadruplex DNA (B, pdb 1KF1), antiparallel DNA quadruplex (C, pdb 143D) and hybrid DNA quadruplex (D, 2HY9). 5' and 3' are indicated by a red and blue ball, respectively.

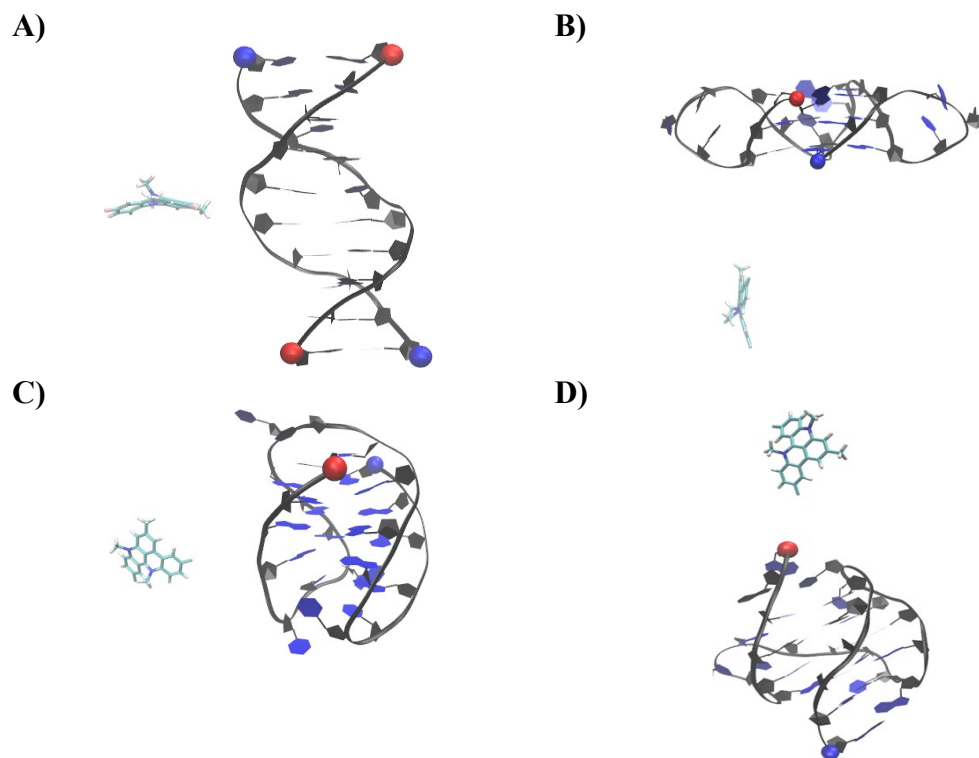

**Figure S3.** RMSD plot of each system: 1NZM (with complex, ligand alone and receptor alone in red, green and blue, respectively) (A), duplex DNA (B), parallel quadruplex DNA (C), anti-parallel quadruplex DNA (D), and hybrid quadruplex DNA (E).

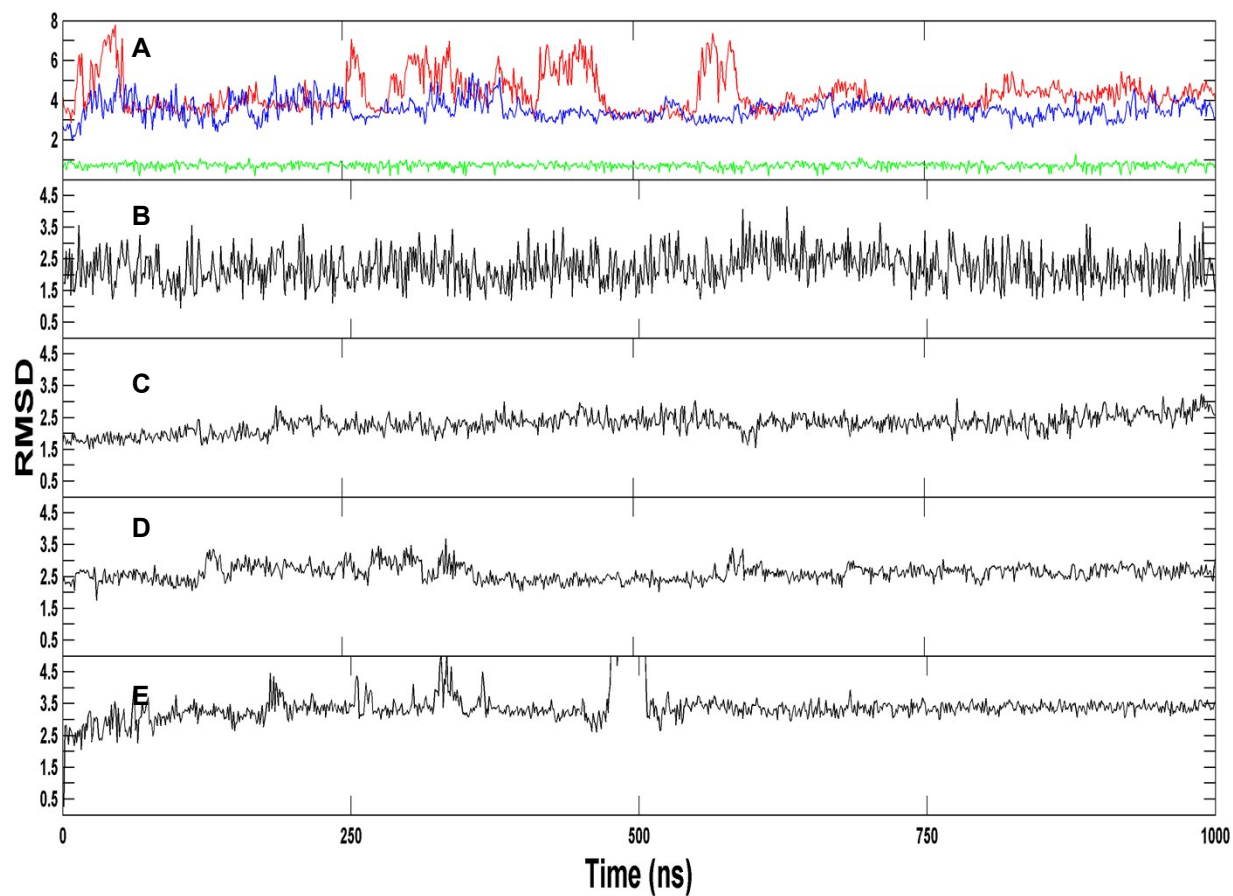

**Figure S4.** RMSD of duplex DNA system and RHPS4 of each trajectory

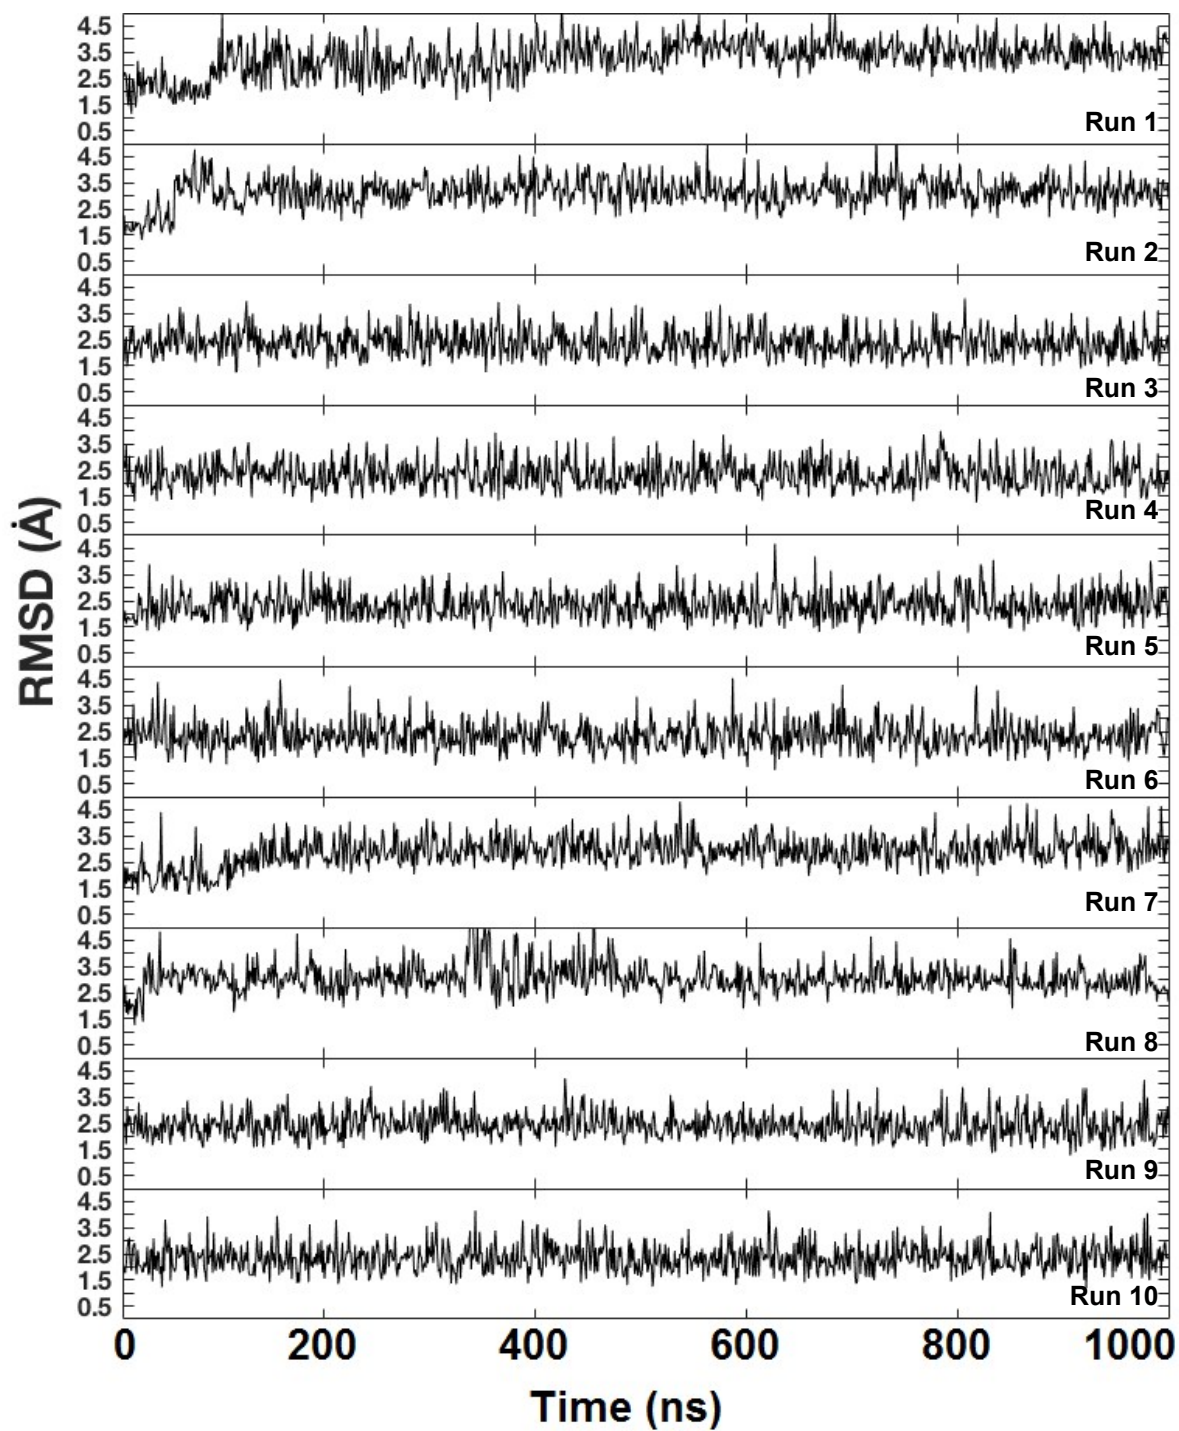

**Figure S5.** RMSD of parallel DNA quadruplex system and RHPS4 of each trajectory

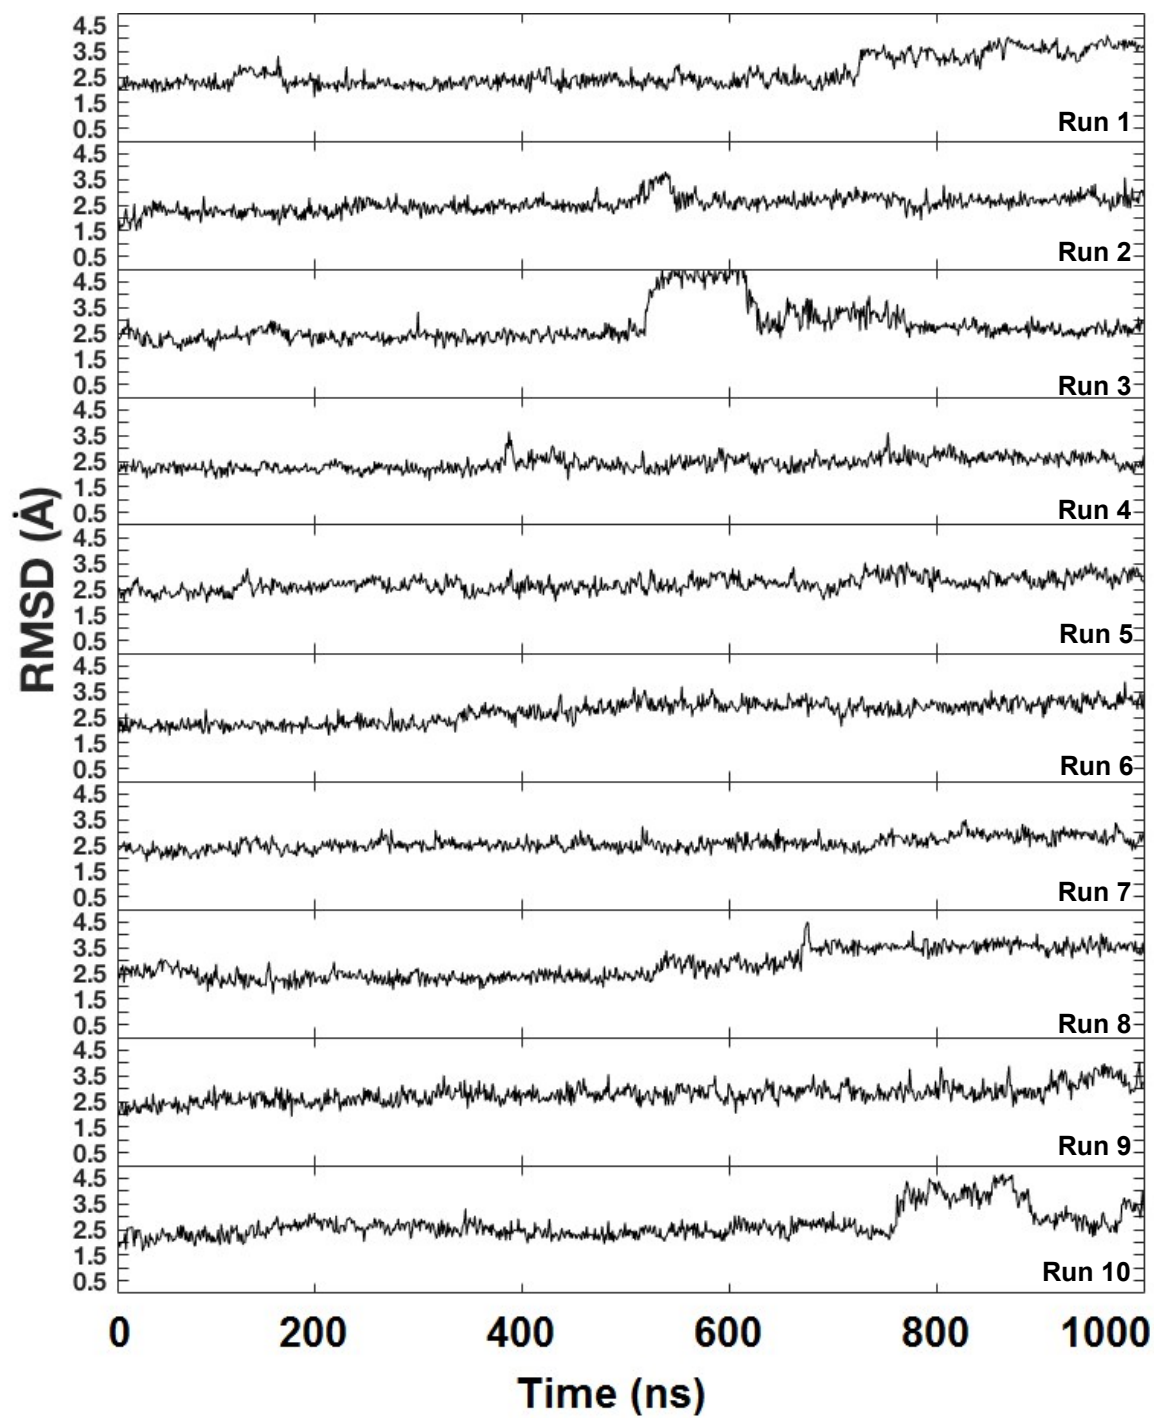

**Figure S6.** RMSD of antiparallel DNA quadruplex system and RHPS4 of each trajectory

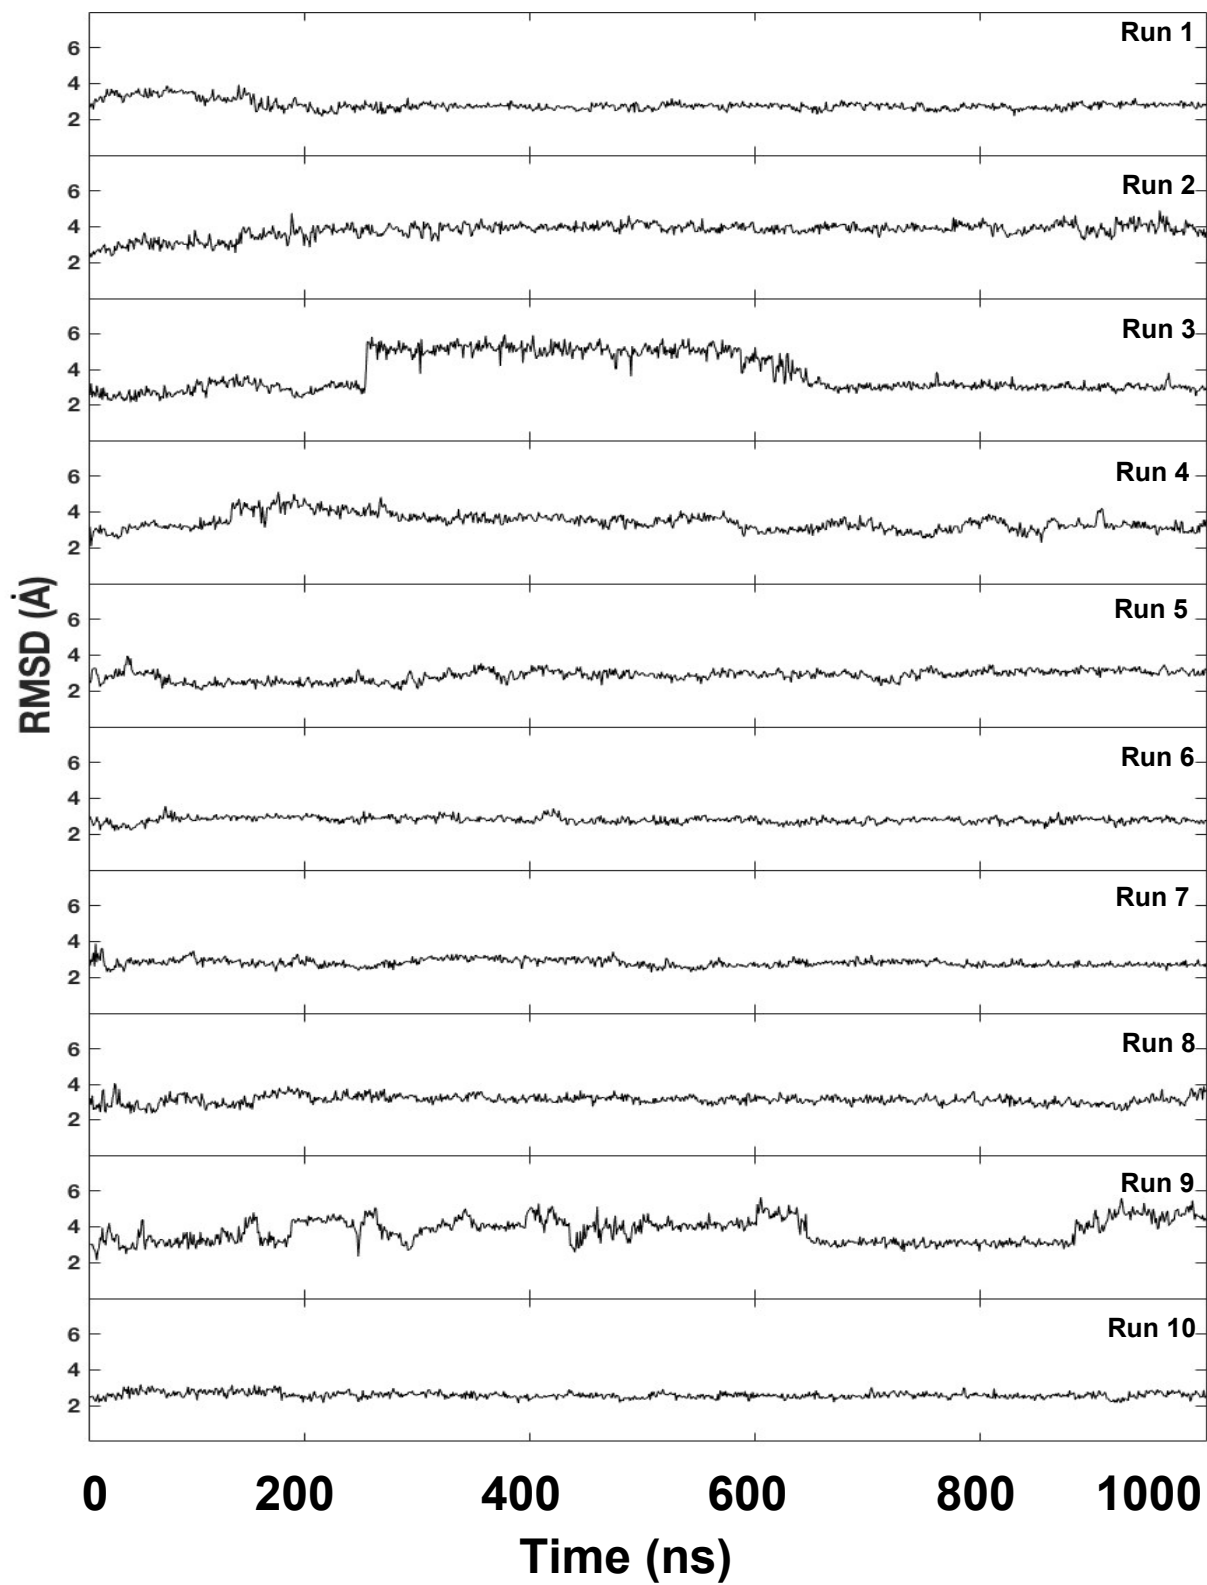

**Figure S7.** RMSD of hybrid DNA quadruplex system and RHPS4 of each trajectory

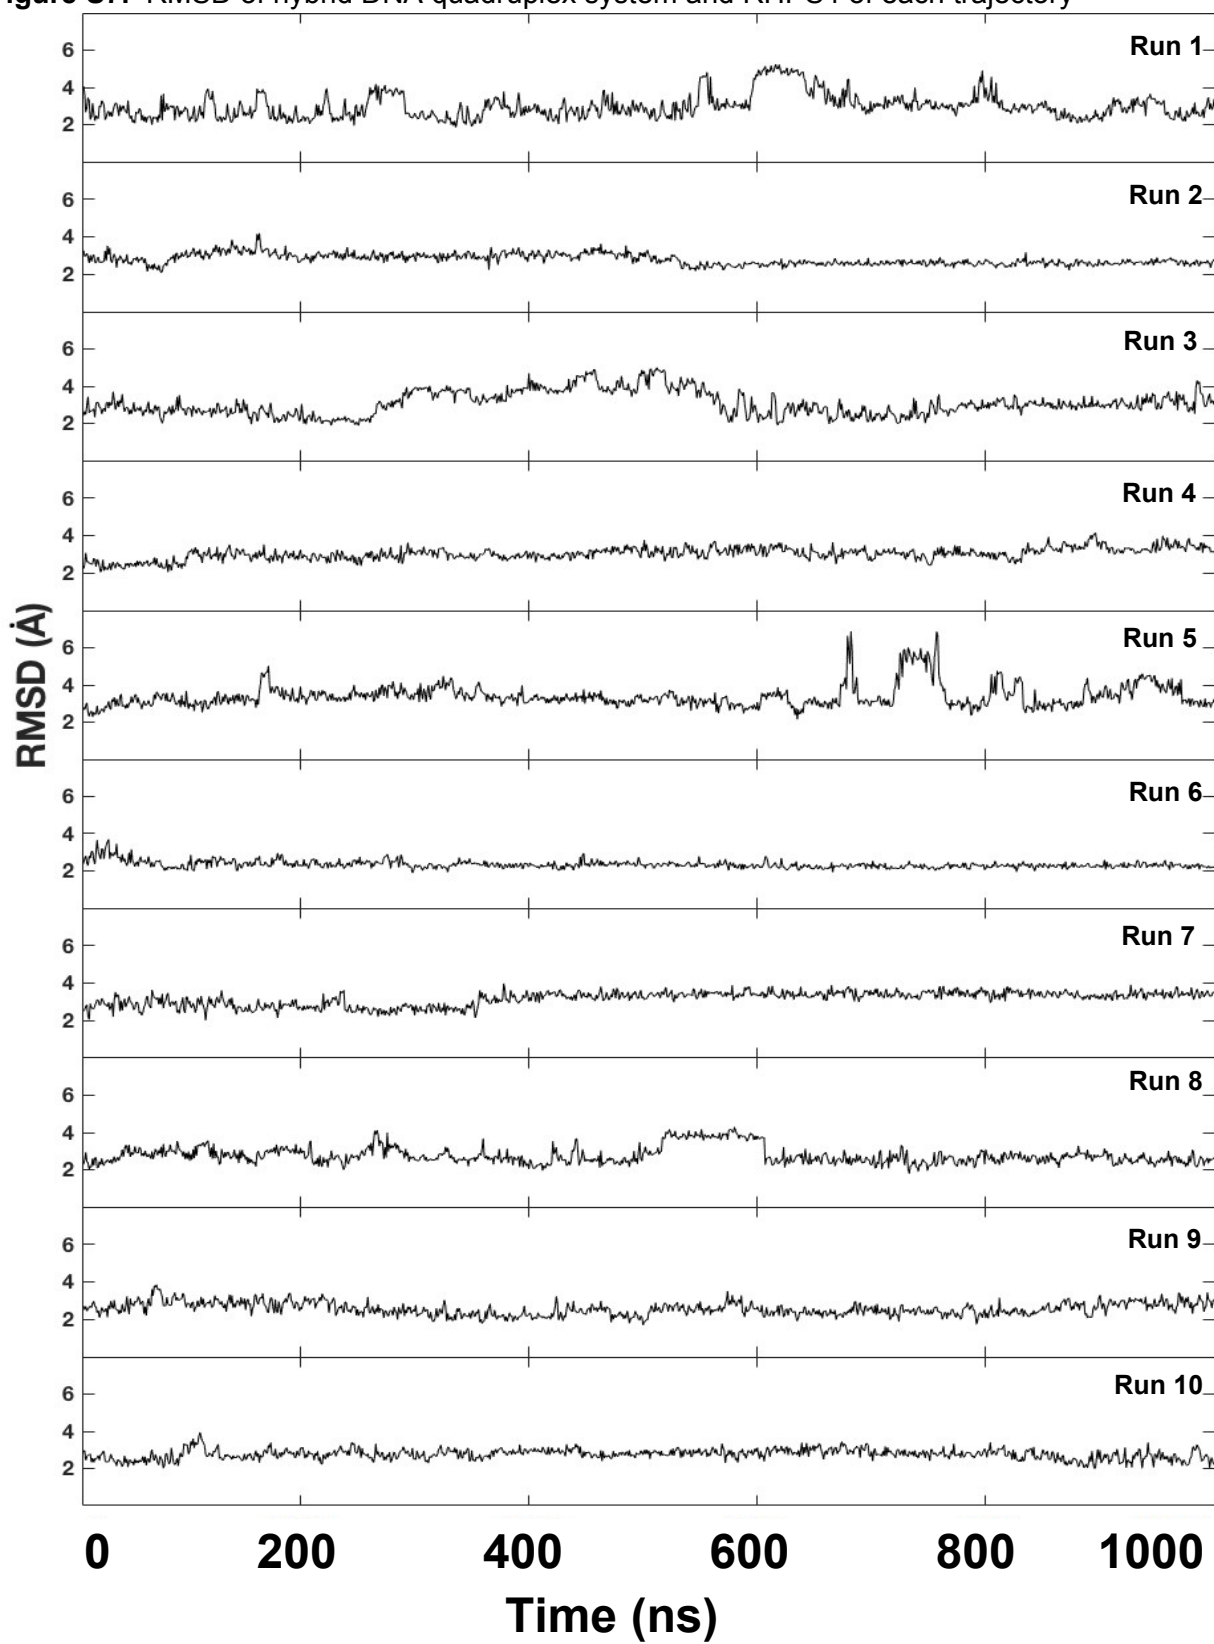

**Figure S8.** Contact number between duplex DNA system and RHPS4 of each trajectory

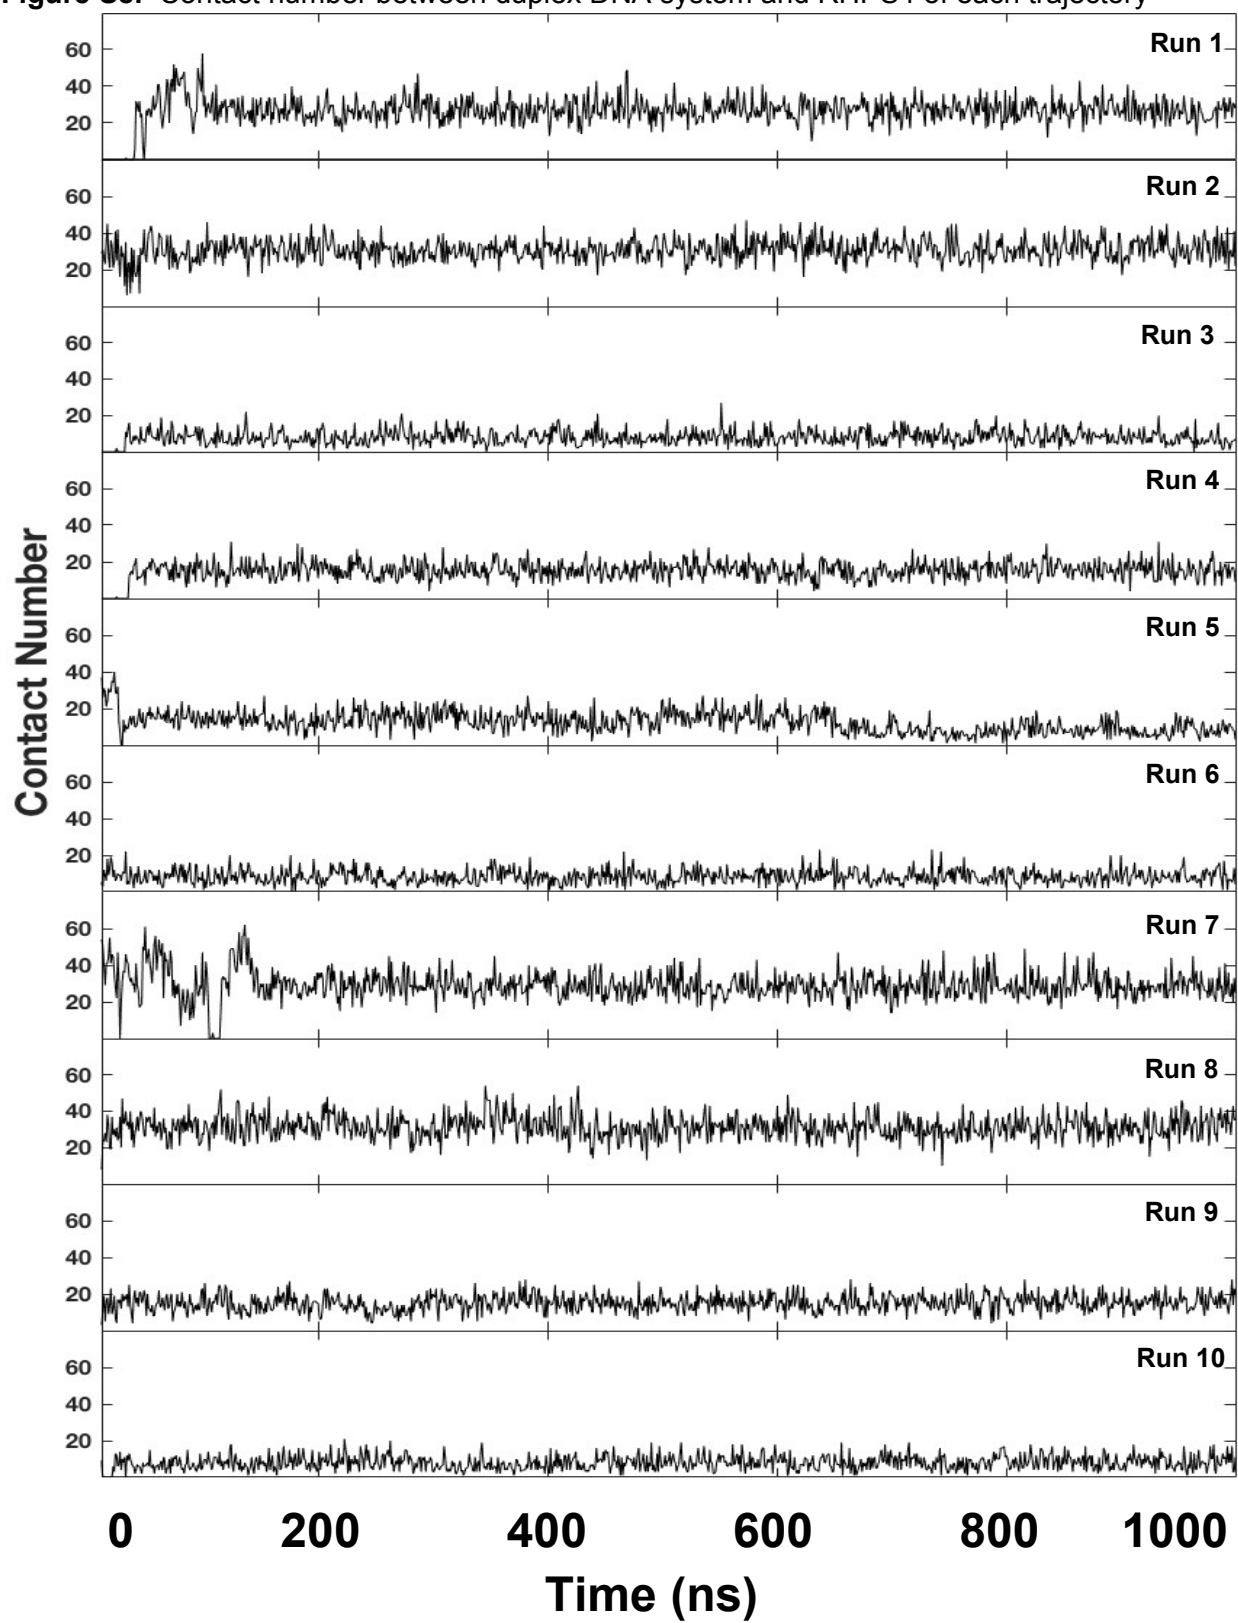



**Figure S9.** Contact number between parallel DNA quadruplex system and RHP54 of each trajectory

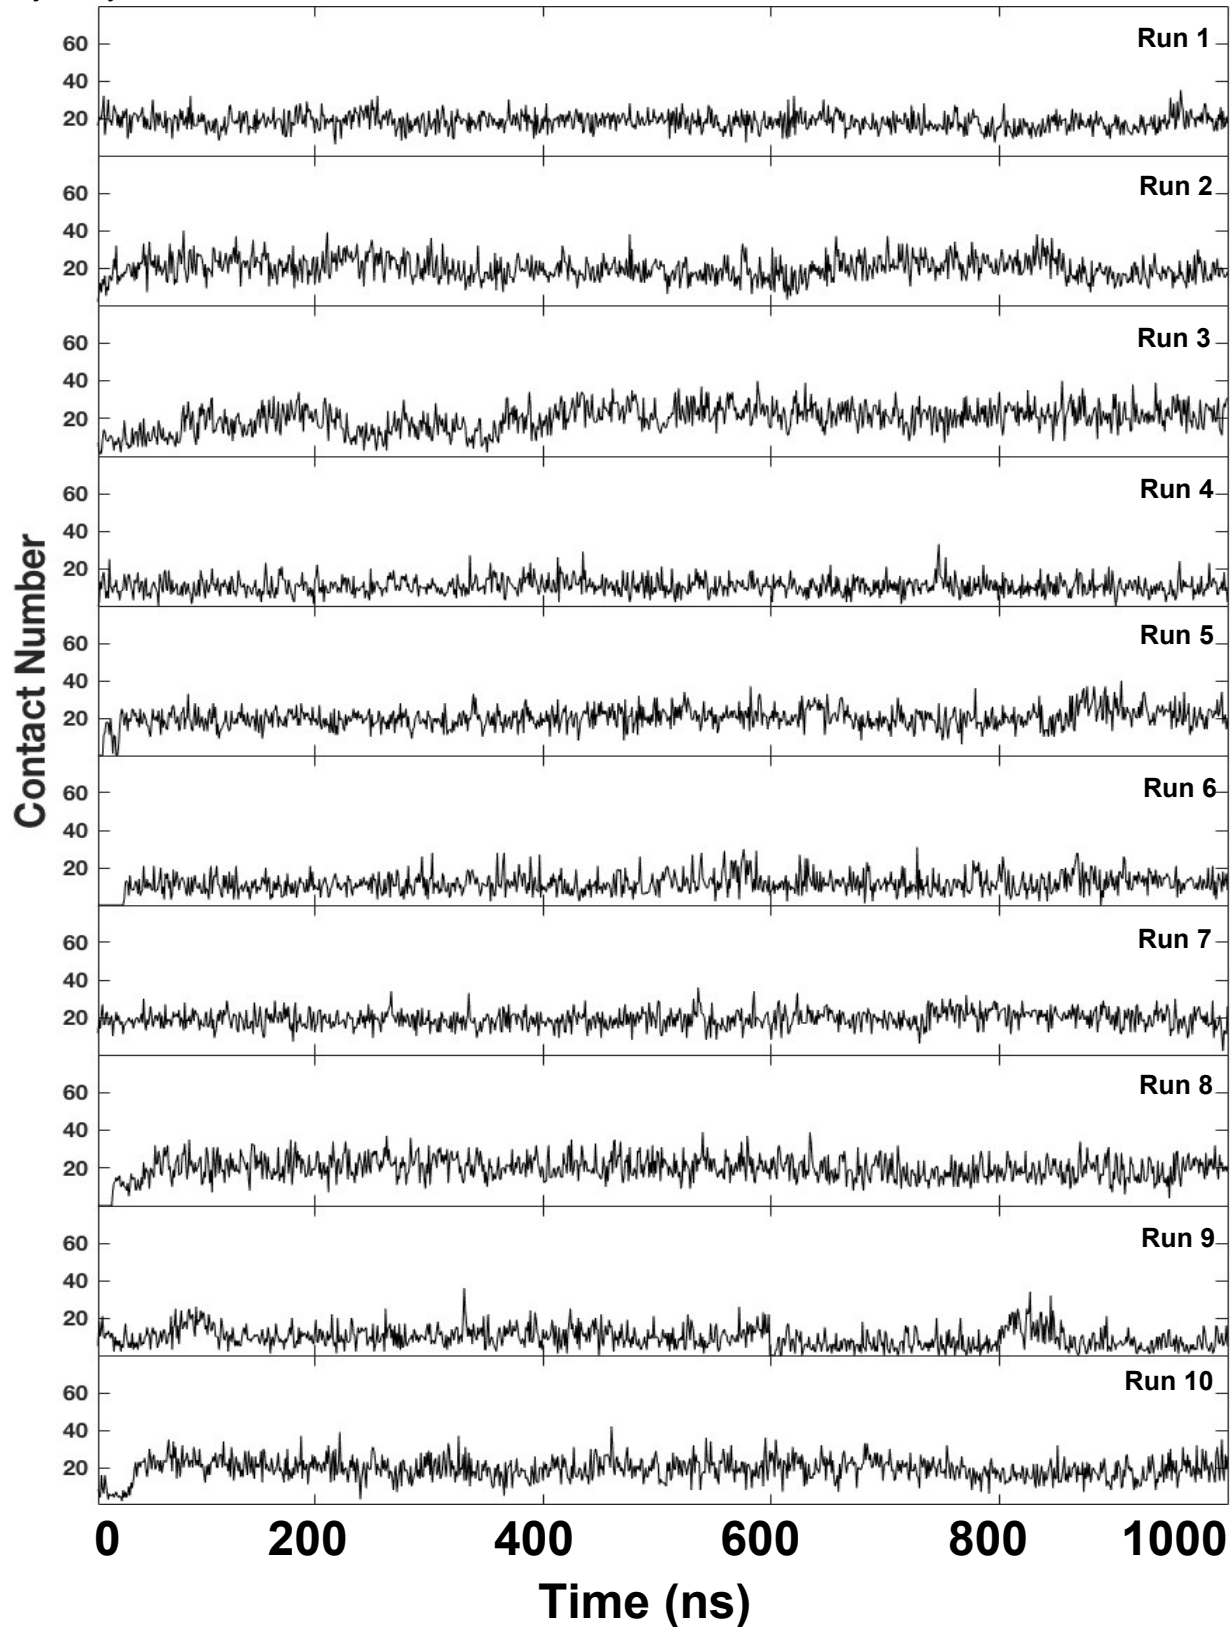

**Figure S10.** Contact number between antiparallel DNA quadruplex system and RHPS4 of each trajectory

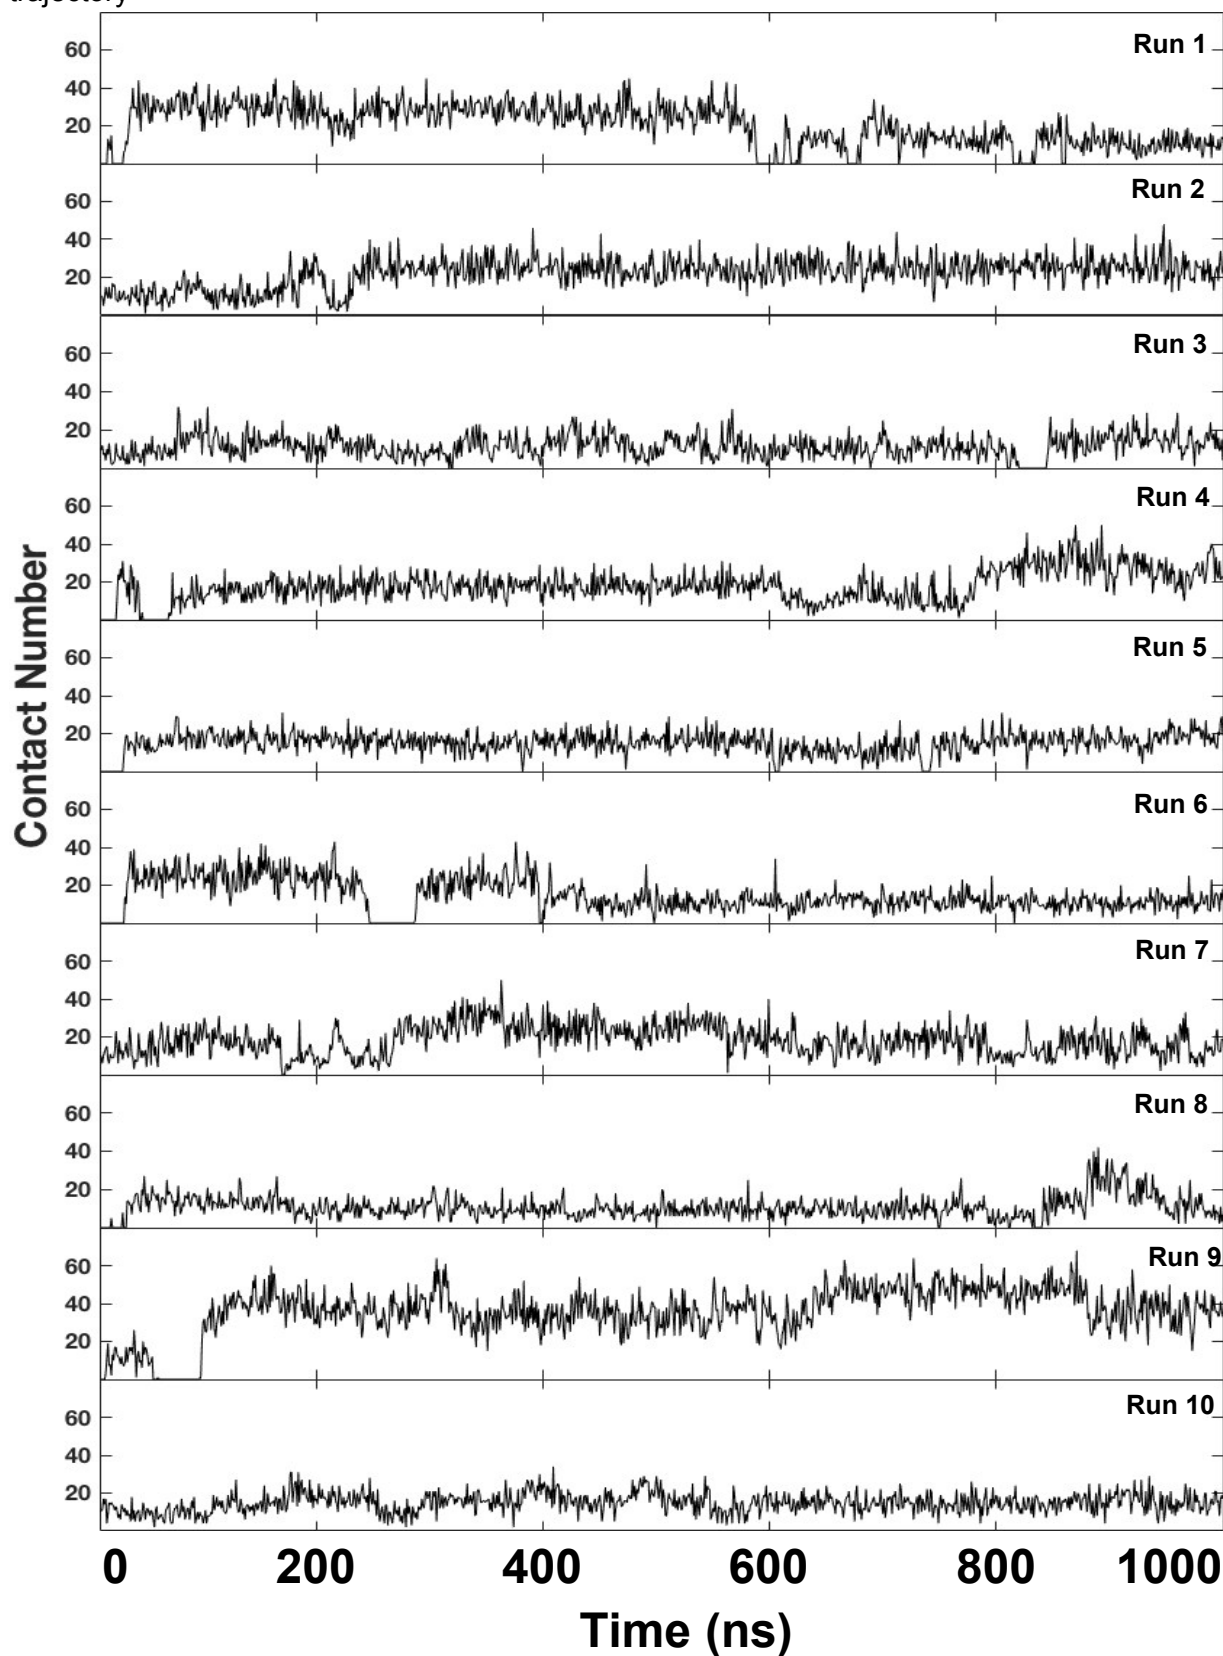

**Figure S11.** Contact number between hybrid DNA quadruplex system and RHPS4 of each trajectory

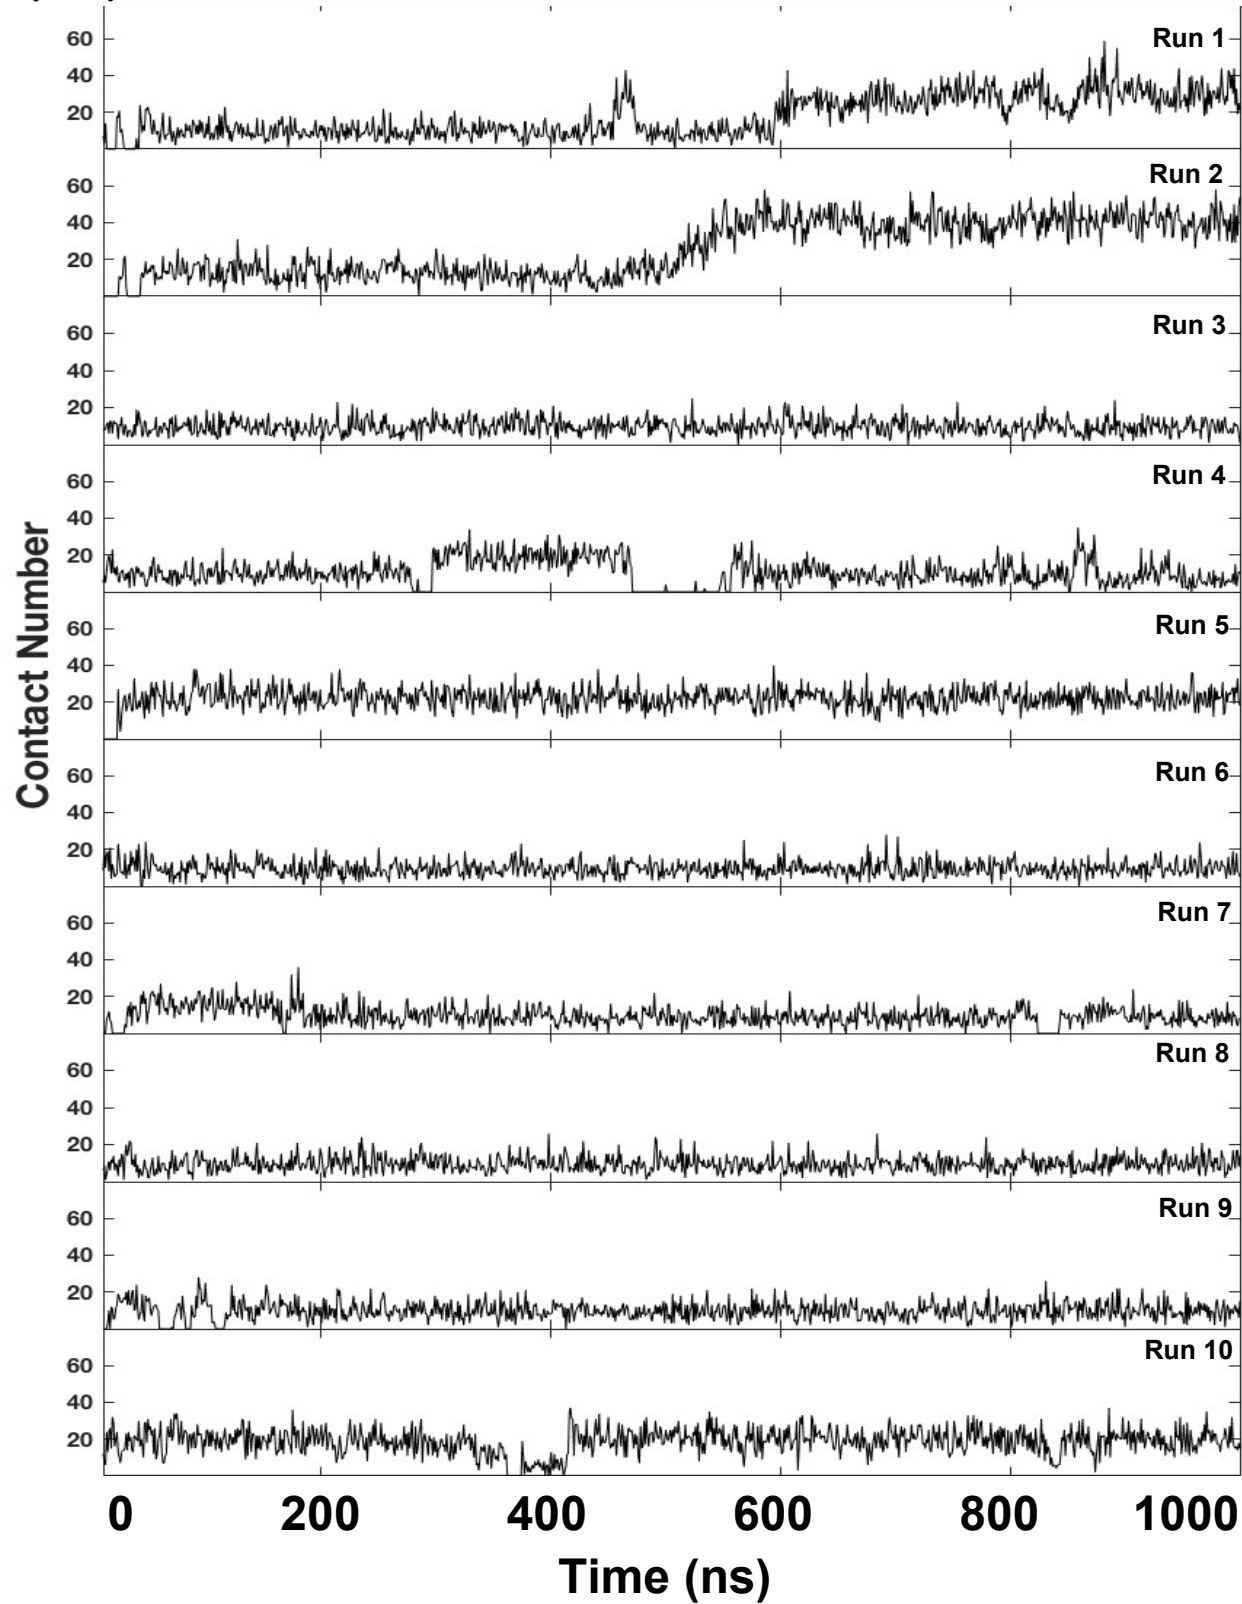

**Figure S12.** Representative structures of the most populated complex structure families (population  $\geq 1\%$ ) of human telomeric duplex DNA from the clustering analysis of the combined binding trajectories. 5' and 3' are indicated by a red and blue ball, respectively.

| Binding Mode                          | Intercalation Binding                                                               |                                                                                     |                                                                                      |
|---------------------------------------|-------------------------------------------------------------------------------------|-------------------------------------------------------------------------------------|--------------------------------------------------------------------------------------|
| Cluster ID                            | A1                                                                                  | A2                                                                                  | A3                                                                                   |
| Representative Structure (Front View) | 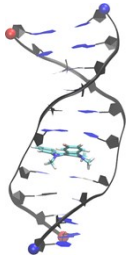   |    |   |
| Representative Structure (Top View)   |   |   |  |
| Population                            | 23%                                                                                 | 22%                                                                                 | 20%                                                                                  |
| Cluster ID                            | A4                                                                                  | A5                                                                                  |                                                                                      |
| Representative Structure (Front View) |  |  |                                                                                      |
| Representative Structure (Top View)   |  |  |                                                                                      |
| Population                            | 19%                                                                                 | 1%                                                                                  |                                                                                      |

|                                       |                                                                                   |
|---------------------------------------|-----------------------------------------------------------------------------------|
| Binding Mode                          | Groove Binding                                                                    |
| Cluster ID                            | B1                                                                                |
| Representative Structure (Front View) | 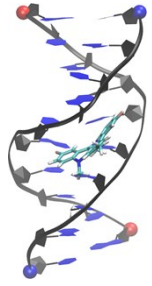 |
| Representative Structure (Top View)   |  |
| Population                            | 5%                                                                                |

| Binding Mode                          | Bottom-Stacking                                                                     | Top-Stacking                                                                         |
|---------------------------------------|-------------------------------------------------------------------------------------|--------------------------------------------------------------------------------------|
| Cluster ID                            | D1                                                                                  | C1                                                                                   |
| Representative Structure (Front View) | 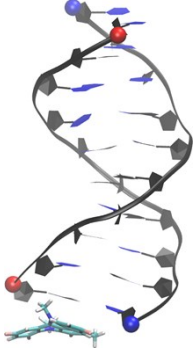 |  |
| Representative Structure (Top View)   |  |  |
| Population                            | 5%                                                                                  | 3%                                                                                   |

**Figure S13.** Last snapshot of ten parallel G-quadruplex-RHPS4 simulations. 5', 3' and K<sup>+</sup> are indicated by a red, blue and yellow ball, respectively.

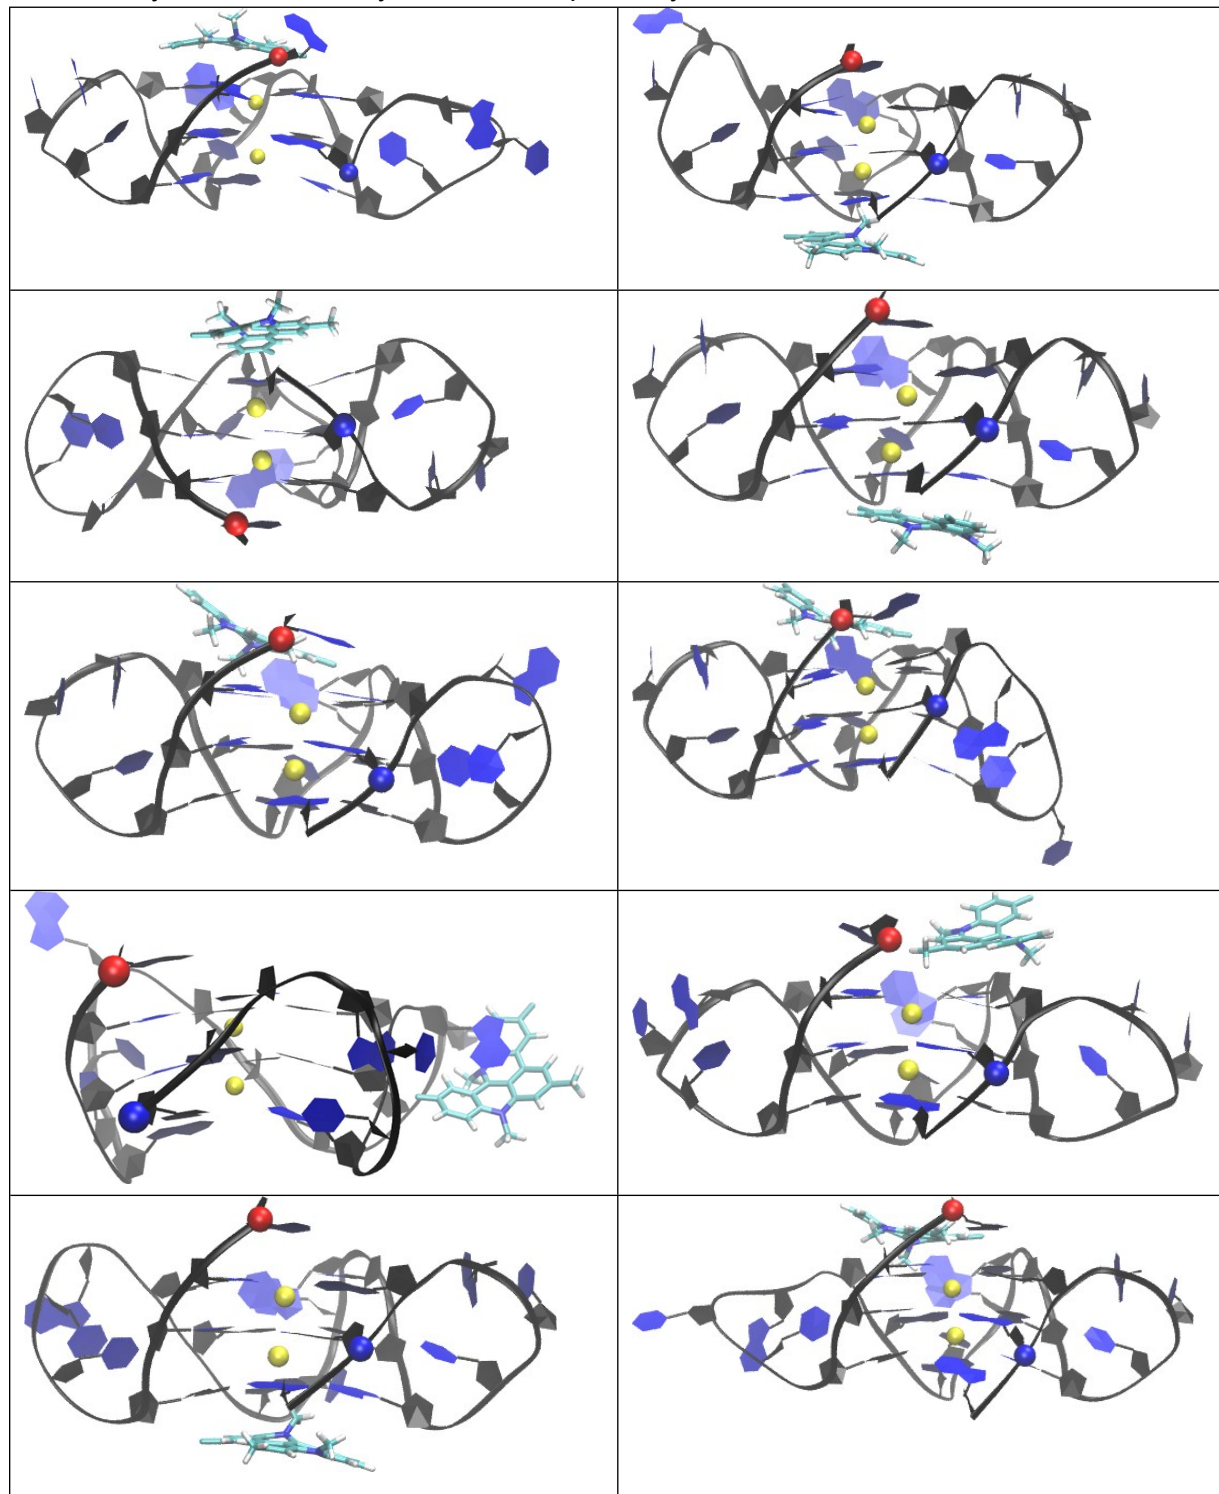

**Figure S14.** Representative structures of the most populated complex structure families (population  $\geq 1\%$ ) of human telomeric parallel quadruplex DNA from the clustering analysis of the combined binding trajectories. 5' and 3' are indicated by a red and blue ball, respectively.

| Binding Mode                          | Top-Stacking                                                                       |                                                                                     |                                                                                      |
|---------------------------------------|------------------------------------------------------------------------------------|-------------------------------------------------------------------------------------|--------------------------------------------------------------------------------------|
| Cluster ID                            | A1                                                                                 | A2                                                                                  | A3                                                                                   |
| Representative Structure (Front View) | 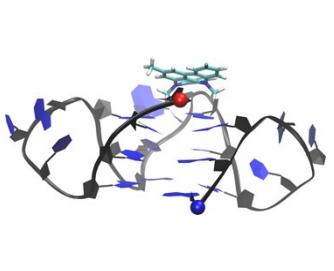  |   |   |
| Representative Structure (Top View)   |  |  |  |
| Population                            | 52%                                                                                | 17%                                                                                 | 4%                                                                                   |

| Binding Mode                          | Bottom-Stacking                                                                     |                                                                                     |                                                                                      |                                                                                       |
|---------------------------------------|-------------------------------------------------------------------------------------|-------------------------------------------------------------------------------------|--------------------------------------------------------------------------------------|---------------------------------------------------------------------------------------|
| Cluster ID                            | B1                                                                                  | B2                                                                                  | B3                                                                                   | B4                                                                                    |
| Representative Structure (Front View) | 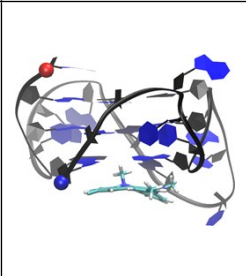 |  |  |  |
| Representative Structure (Top View)   |  |  |  |  |

|            |     |    |    |    |
|------------|-----|----|----|----|
| Population | 13% | 5% | 4% | 4% |
|------------|-----|----|----|----|

|                                       |                                                                                   |
|---------------------------------------|-----------------------------------------------------------------------------------|
| Binding Mode                          | Side-Loop Binding                                                                 |
| Cluster ID                            | C1                                                                                |
| Representative Structure (Front View) | 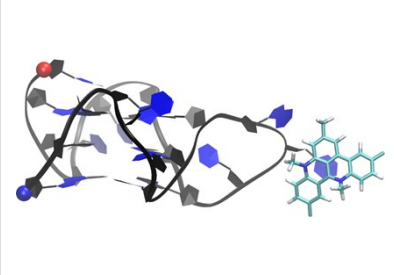 |
| Representative Structure (Top View)   |  |
| Population                            | 5%                                                                                |



**Figure S15.** Last snapshot of ten anti-parallel G-quadruplex-RHPS4 simulations. 5', 3' and Na<sup>+</sup> are indicated by a red, blue and yellow ball, respectively.

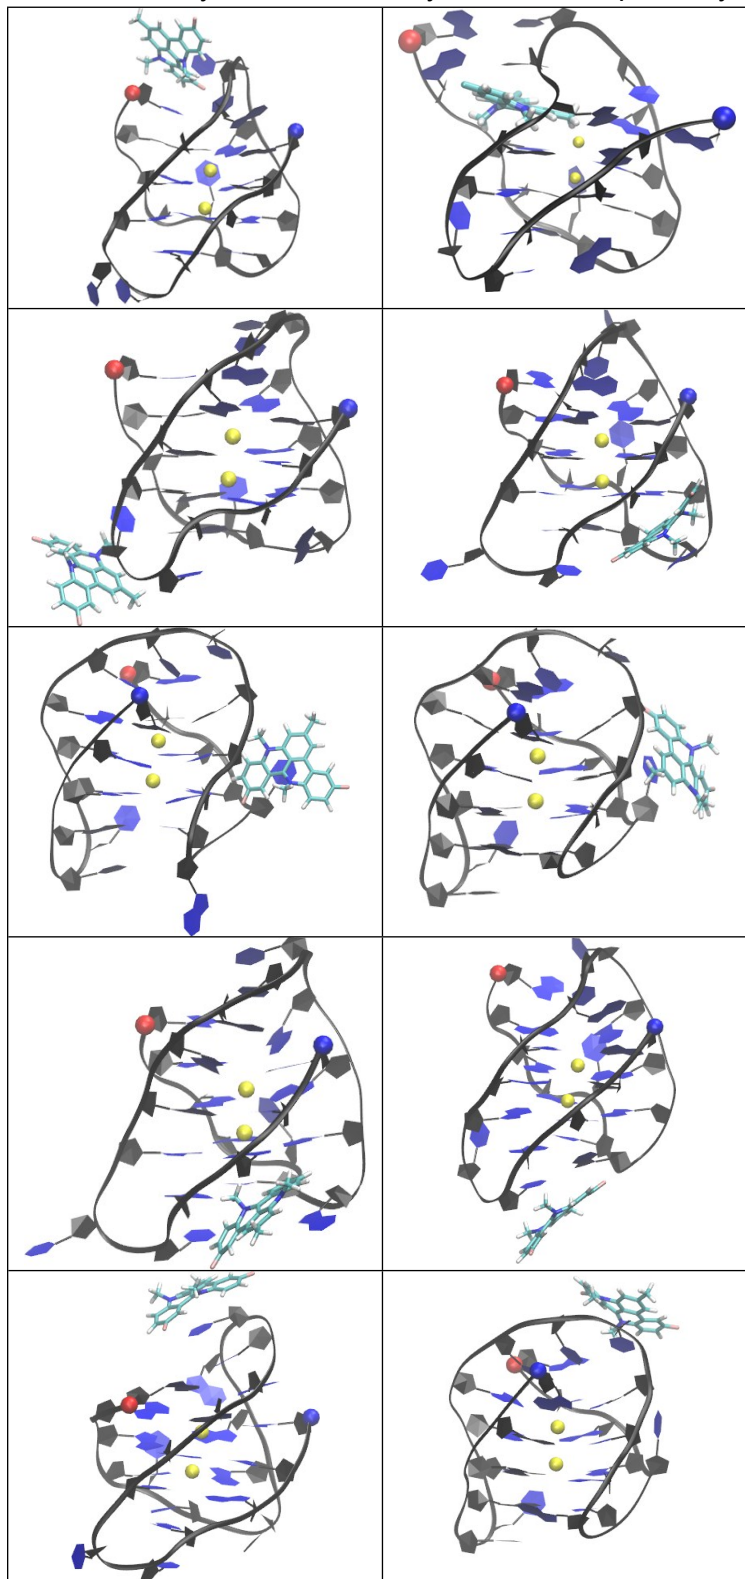

**Figure S16.** Representative structures of the most populated complex structure families (population  $\geq 1\%$ ) of human telomeric antiparallel quadruplex DNA from the clustering analysis of the combined binding trajectories. 5' and 3' are indicated by a red and blue ball, respectively.

| Binding Mode                          | Top Intercalation/Insertion |     |     |
|---------------------------------------|-----------------------------|-----|-----|
| Cluster ID                            | A1                          | A2  | A3  |
| Representative Structure (Front View) |                             |     |     |
| Representative Structure (Top View)   |                             |     |     |
| Population                            | 19%                         | 17% | 11% |

| Binding Mode                          | Bottom Insertion                                                                  |                                                                                    |
|---------------------------------------|-----------------------------------------------------------------------------------|------------------------------------------------------------------------------------|
| Cluster ID                            | B1                                                                                | B2                                                                                 |
| Representative Structure (Front View) | 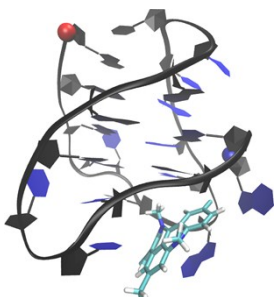 |  |
| Representative Structure (Top View)   |  |  |
| Population                            | 35%                                                                               | 6%                                                                                 |

| Binding Mode                          | Side-Groove Binding                                                                 |
|---------------------------------------|-------------------------------------------------------------------------------------|
| Cluster ID                            | C1                                                                                  |
| Representative Structure (Front View) | 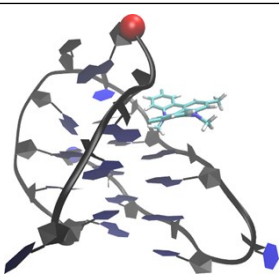 |
| Representative Structure (Top View)   |  |
| Population                            | 5%                                                                                  |

**Figure S17.** Last snapshot of ten hybrid G-quadruplex-RHPS4 simulations. 5', 3' and K<sup>+</sup> are indicated by a red, blue and yellow ball, respectively.

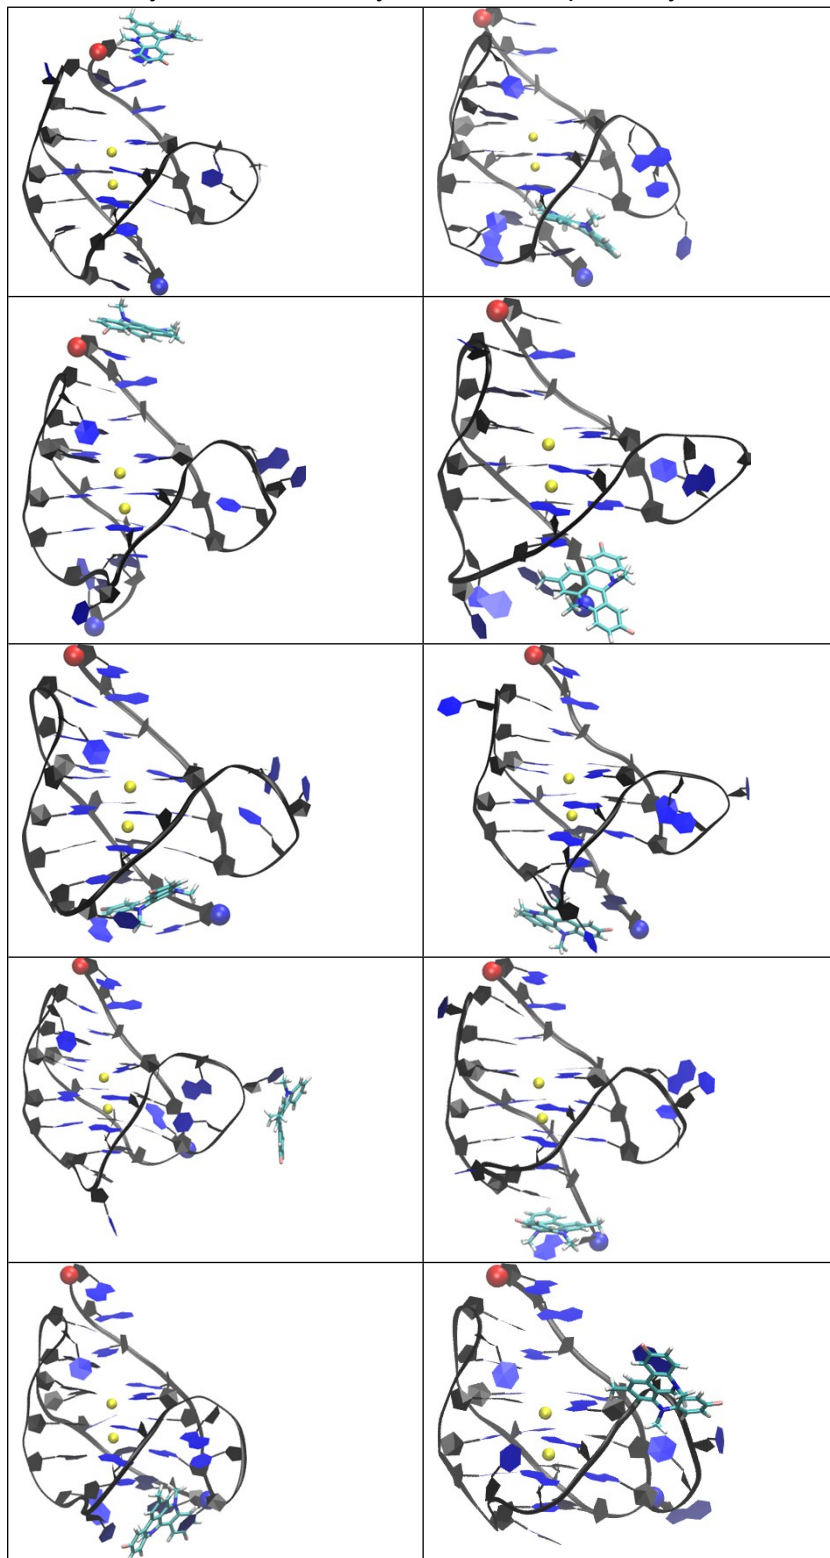

**Figure S18.** Representative structures of the most populated complex structure families (population  $\geq 1\%$ ) of human telomeric hybrid quadruplex DNA from the clustering analysis of the combined binding trajectories. 5' and 3' are indicated by a red and blue ball, respectively.

| Binding Mode                          | Top-Stacking                                                                       |                                                                                     |                                                                                      |
|---------------------------------------|------------------------------------------------------------------------------------|-------------------------------------------------------------------------------------|--------------------------------------------------------------------------------------|
| Cluster ID                            | A1                                                                                 | A2                                                                                  | A3                                                                                   |
| Representative Structure (Front View) | 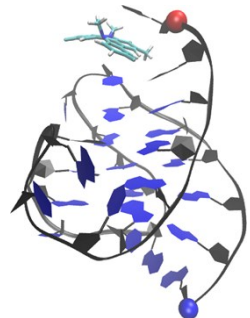  |   |   |
| Representative Structure (Top View)   |  |  |  |
| Population                            | 62%                                                                                | 4%                                                                                  | 2%                                                                                   |

| Binding Mode                          | Bottom-Stacking                                                                   |
|---------------------------------------|-----------------------------------------------------------------------------------|
| Cluster ID                            | B1                                                                                |
| Representative Structure (Front View) | 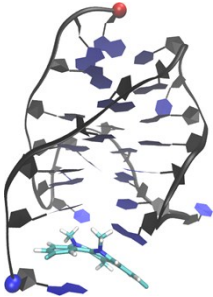 |
| Representative Structure (Top View)   |  |
| Population                            | 16%                                                                               |

| Binding Mode                          | Side-Loop Binding                                                                   |                                                                                      |                                                                                       |
|---------------------------------------|-------------------------------------------------------------------------------------|--------------------------------------------------------------------------------------|---------------------------------------------------------------------------------------|
| Cluster ID                            | C1                                                                                  | C2                                                                                   | C3                                                                                    |
| Representative Structure (Front View) | 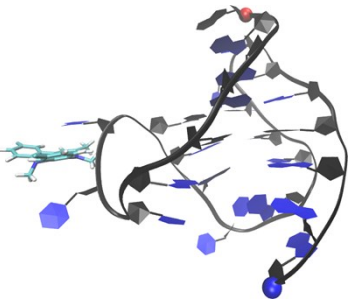 |  |  |
| Representative Structure (Top View)   |  |  |  |
| Population                            | 8%                                                                                  | 3%                                                                                   | 2%                                                                                    |

**Figure S19.** A trajectory of RHPS4 intercalating to human telomeric duplex DNA with a broken base pair. The order parameters include hydrogen bonds in first (red), second (blue) and third (yellow) of duplex base pairing layer (H-Bond), center-to-center distance (R), the drug-base dihedral angle, ligand RMSD and MM-GBSA binding energy ( $\Delta E$ ). 5' and 3' of the DNA chain are indicated by a red and blue ball, respectively.

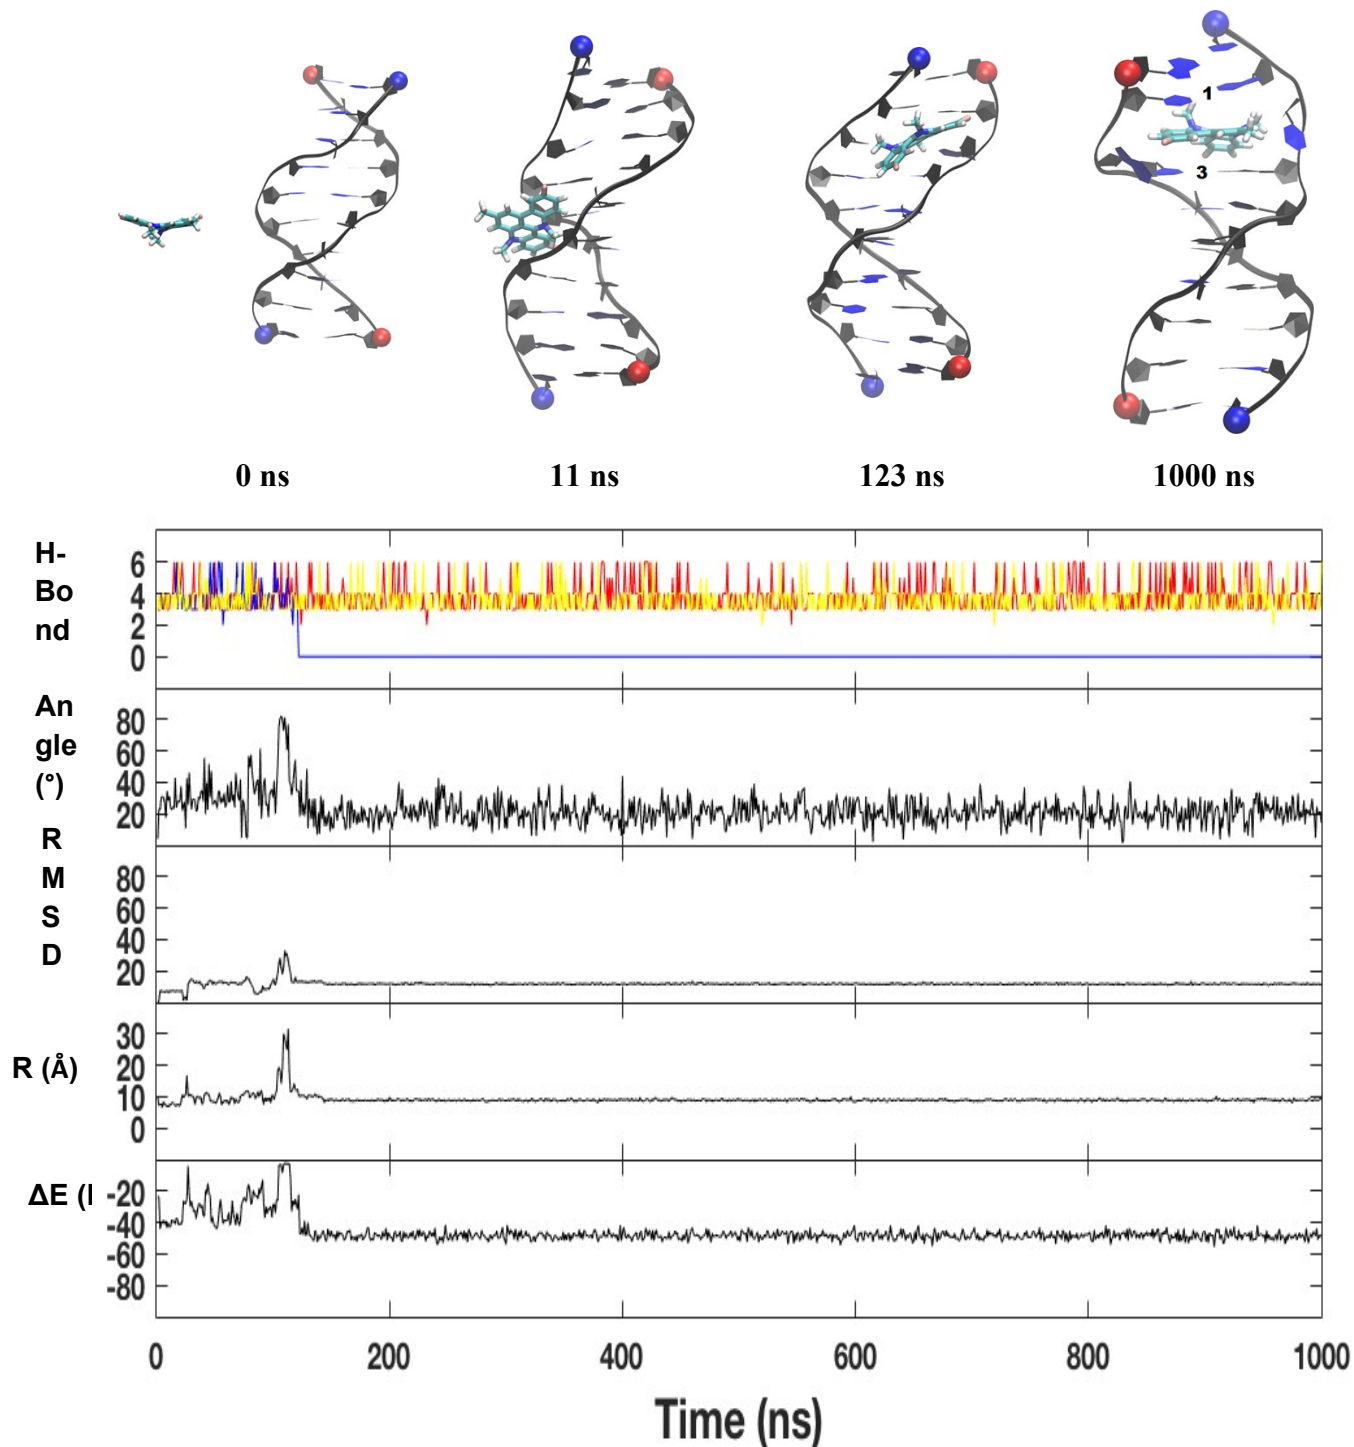

**Figure S20.** A trajectory of RHPS4 intercalating to human telomeric duplex DNA with a broken base pair. The order parameters include hydrogen bonds in first (red), second (blue) and third (yellow) of duplex base pairing layer (H-Bond), center-to-center distance (R), the drug-base dihedral angle, ligand RMSD and MM-GBSA binding energy ( $\Delta E$ ). 5' and 3' of the DNA chain are indicated by a red and blue ball, respectively.

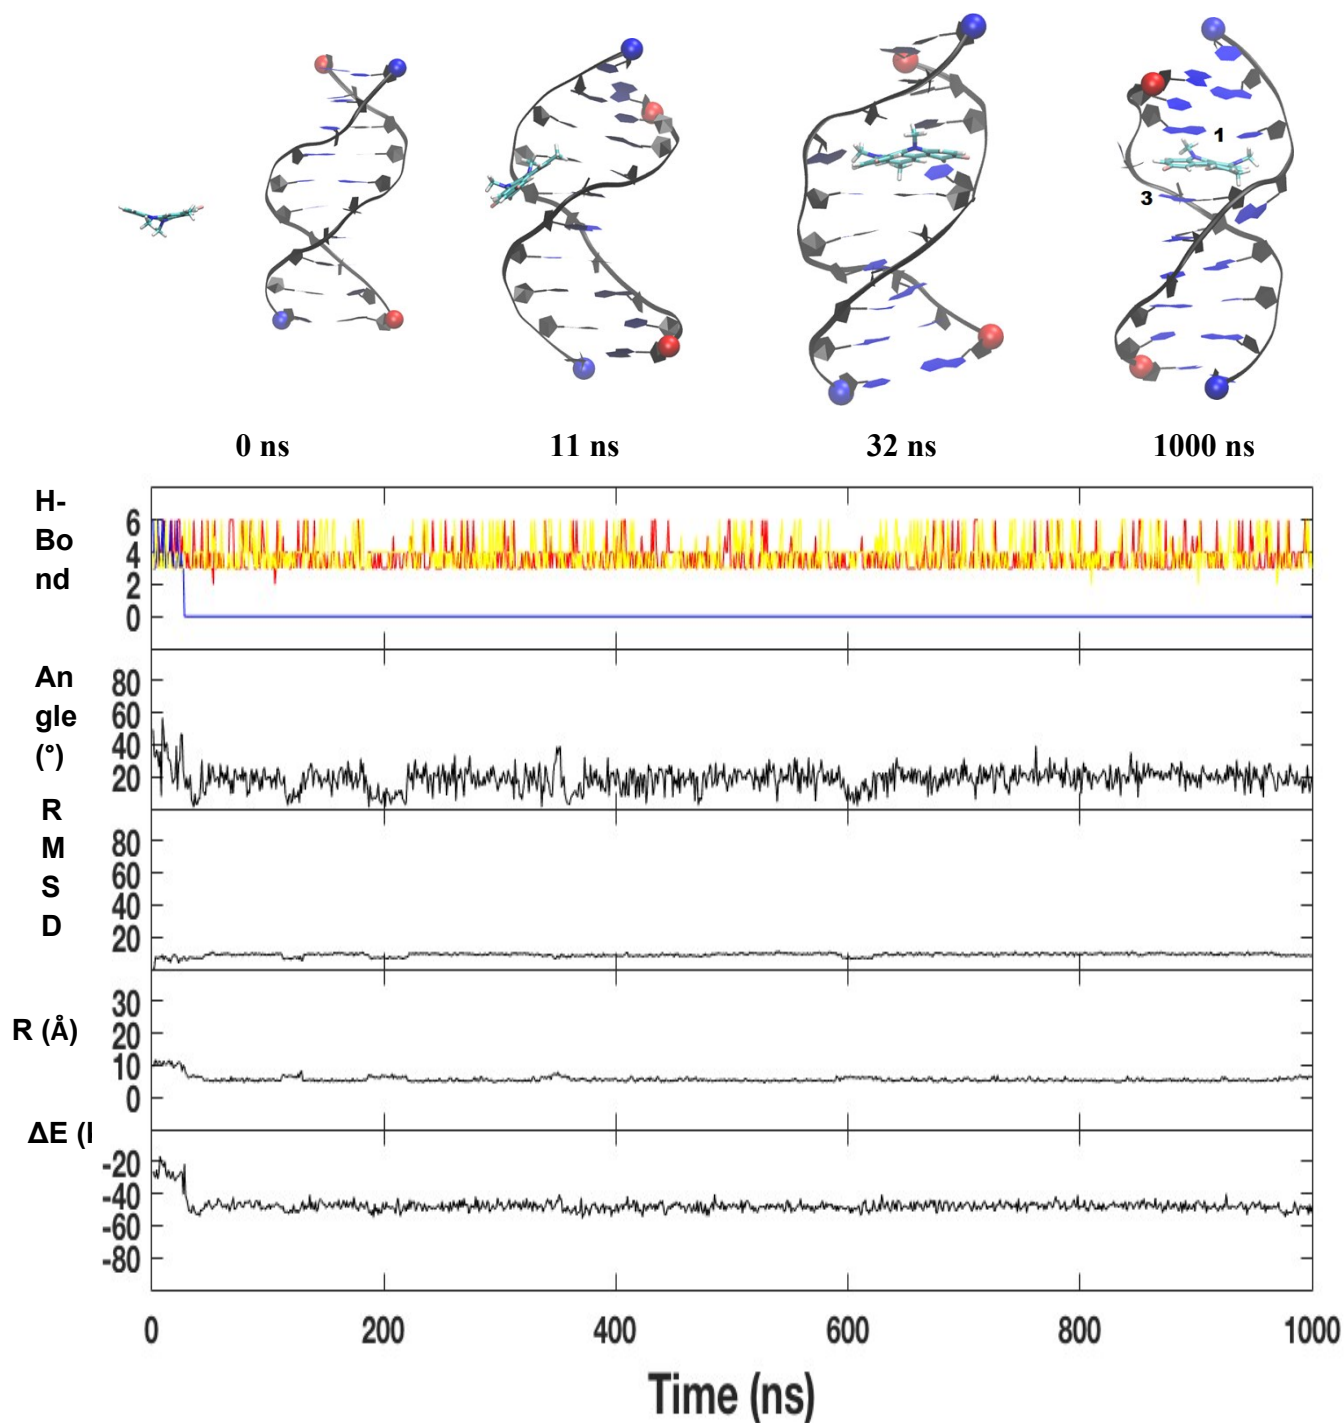



**Figure S21.** A representative trajectory of RHPS4 binding to the top of human telomeric parallel quadruplex DNA. The order parameter include hydrogen bonds present in first (red), second (blue) and third (yellow) of G-tetrad layer of quadruplex (H-Bond), center-to-center distance (R), the drug-base dihedral angle, ligand RMSD and MM-GBSA binding energy ( $\Delta E$ ). 5' and 3' of the DNA chain are indicated by a red and blue ball, respectively.

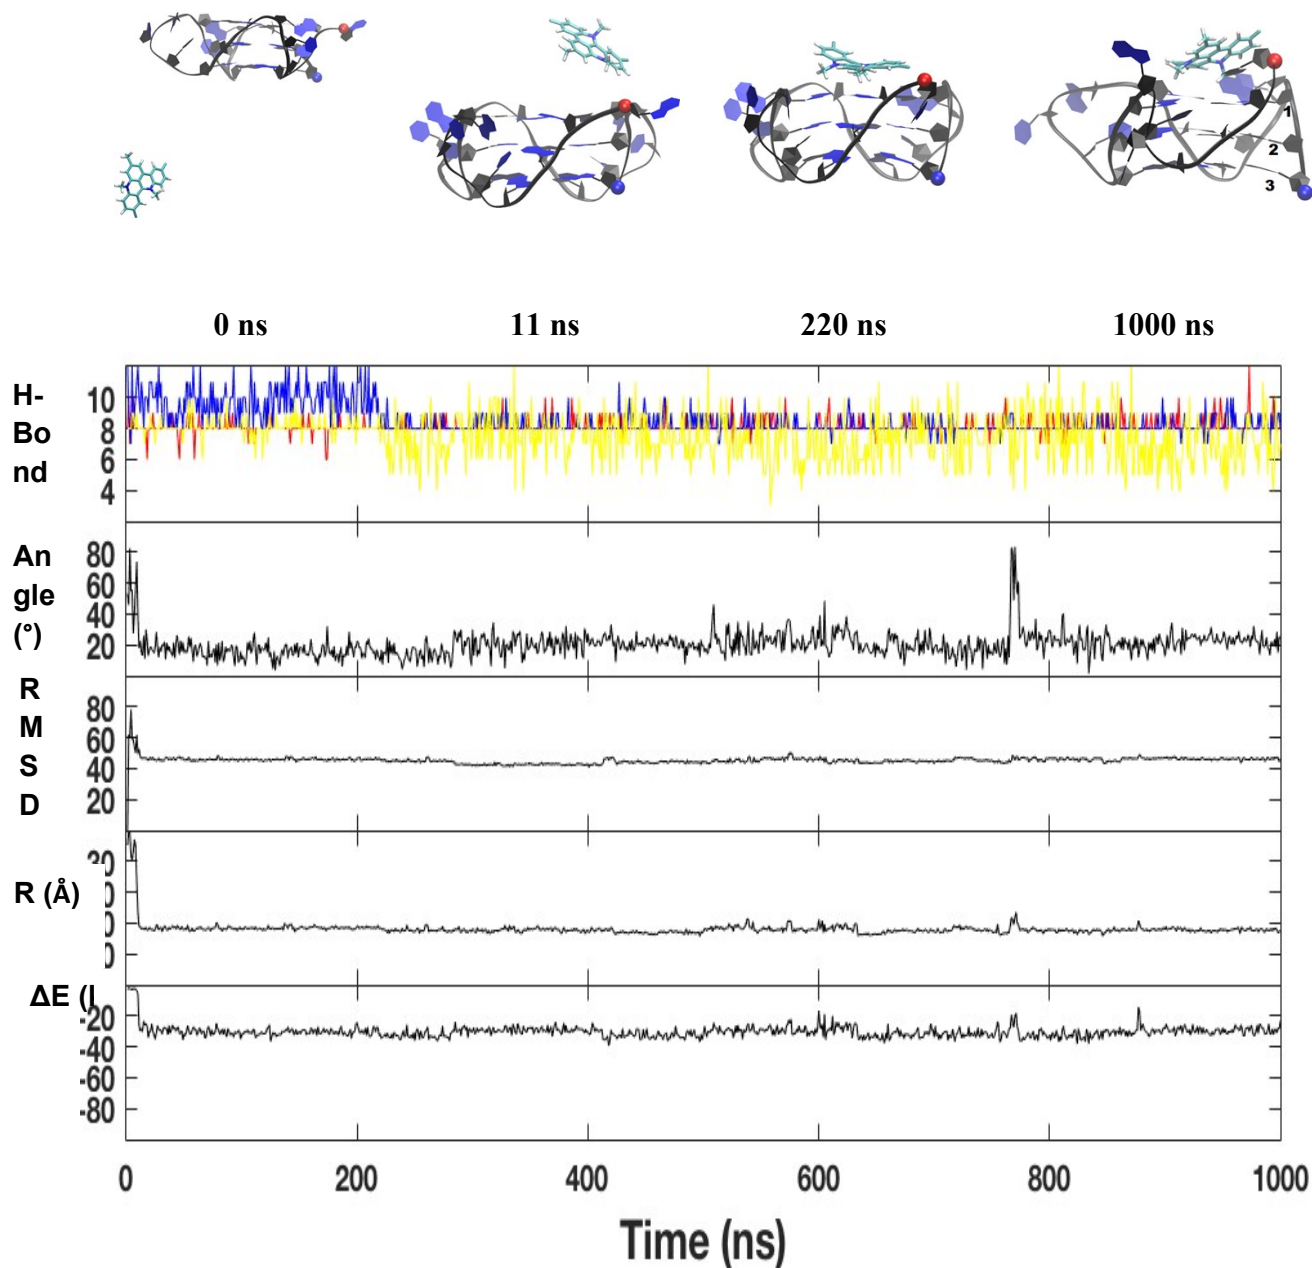

**Figure S22.** A representative trajectory of RHPS4 binding to the side loop of human telomeric parallel DNA quadruplex. The order parameter include hydrogen bonds present in first (red), second (blue) and third (yellow) of G-tetrad layer of quadruplex (H-Bond), center-to-center distance (R), the drug-base dihedral angle, ligand RMSD and MM-GBSA binding energy ( $\Delta E$ ). 5' and 3' of the DNA chain are indicated by a red and blue ball, respectively.

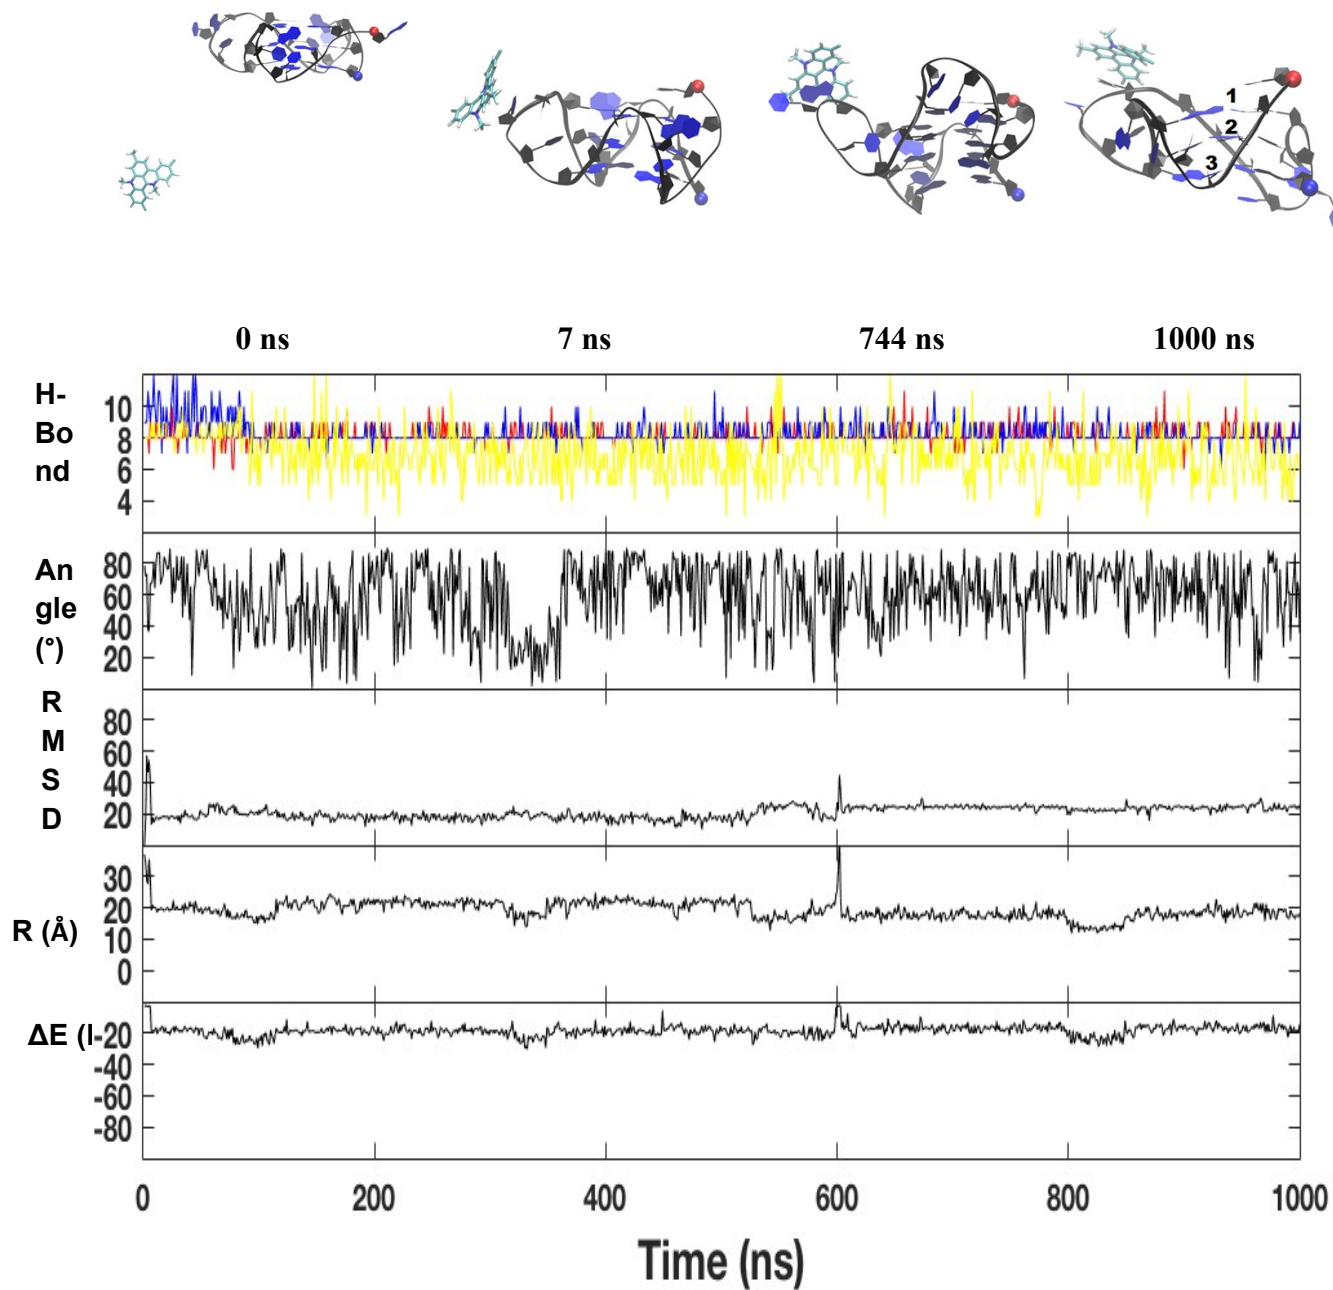

**Figure S23.** A representative trajectory of RHPS4 binding to the bottom of human telomeric antiparallel DNA quadruplex. The order parameter include hydrogen bonds present in first (red), second (blue) and third (yellow) of G-tetrad layer of quadruplex (H-Bond), center-to-center distance (R), the drug-base dihedral angle, ligand RMSD and MM-GBSA binding energy ( $\Delta E$ ). 5' and 3' of the DNA chain are indicated by a red and blue ball, respectively.

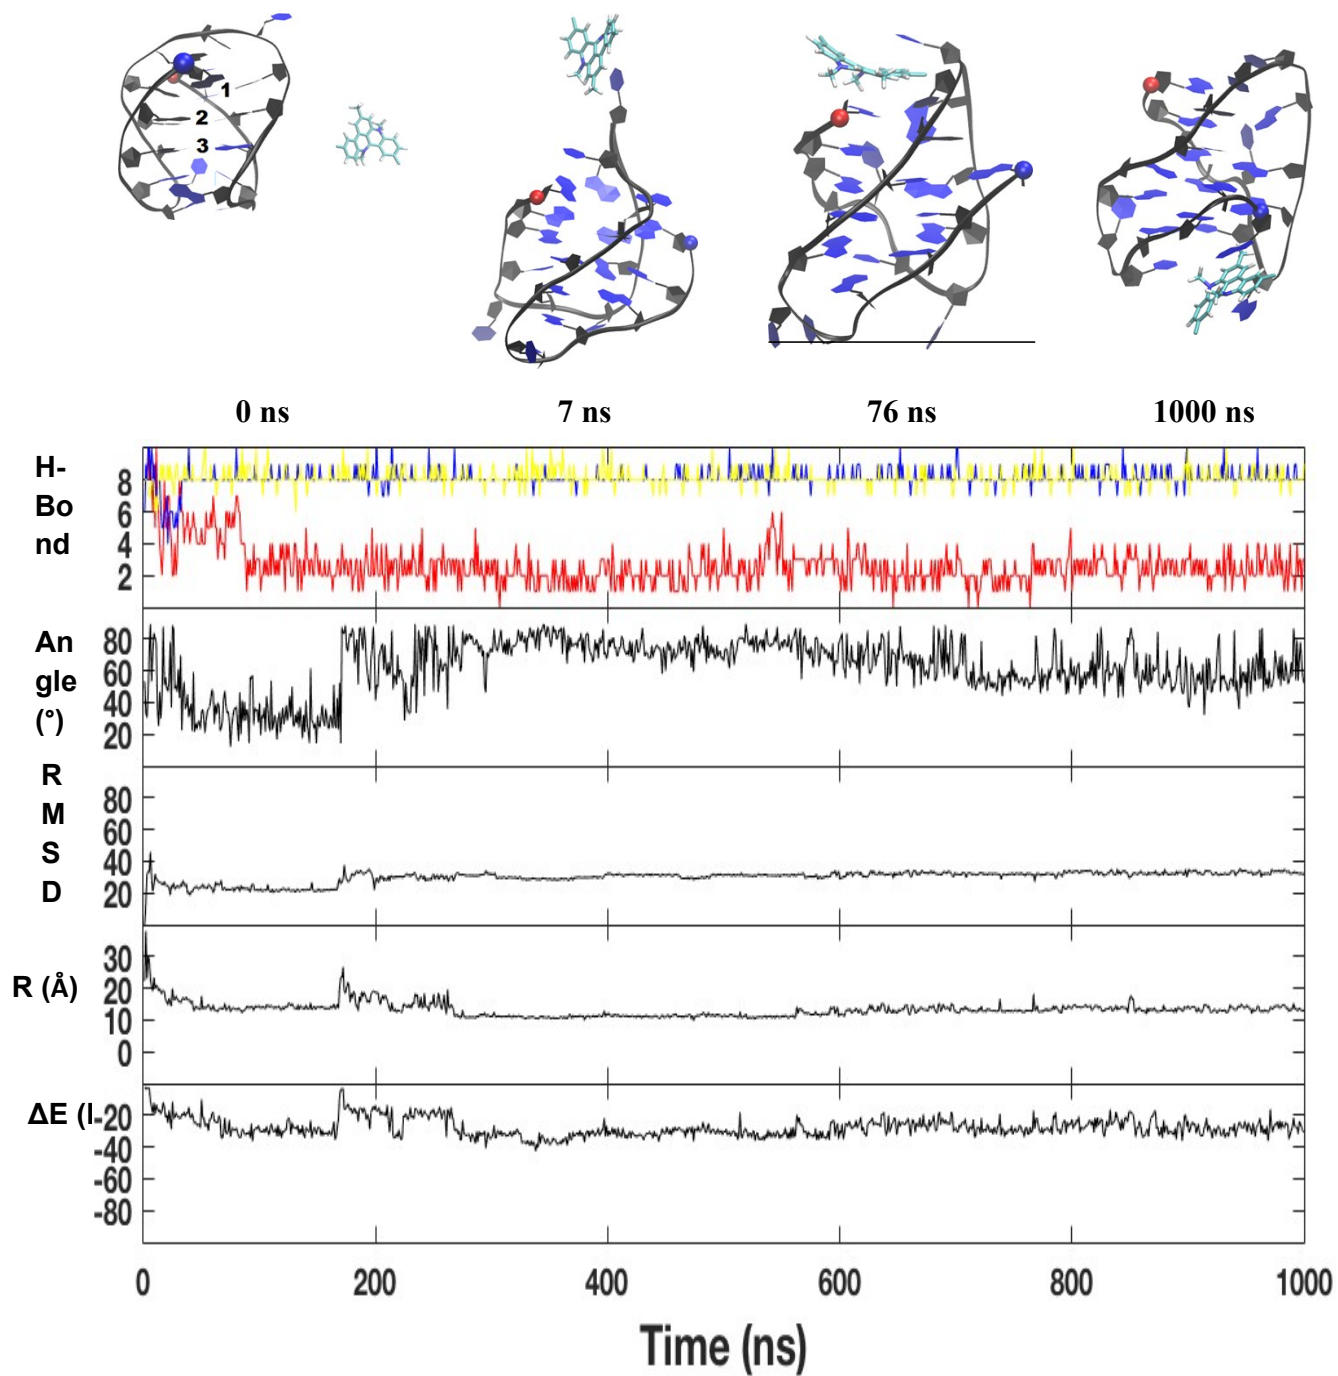

**Figure S24.** A representative trajectory of RHPS4 binding to the bottom of human telomeric antiparallel DNA quadruplex. The order parameter include hydrogen bonds present in first (red), second (blue) and third (yellow) of G-tetrad layer of quadruplex (H-Bond), center-to-center distance (R), the drug-base dihedral angle, ligand RMSD and MM-GBSA binding energy ( $\Delta E$ ). 5' and 3' of the DNA chain are indicated by a red and blue ball, respectively.

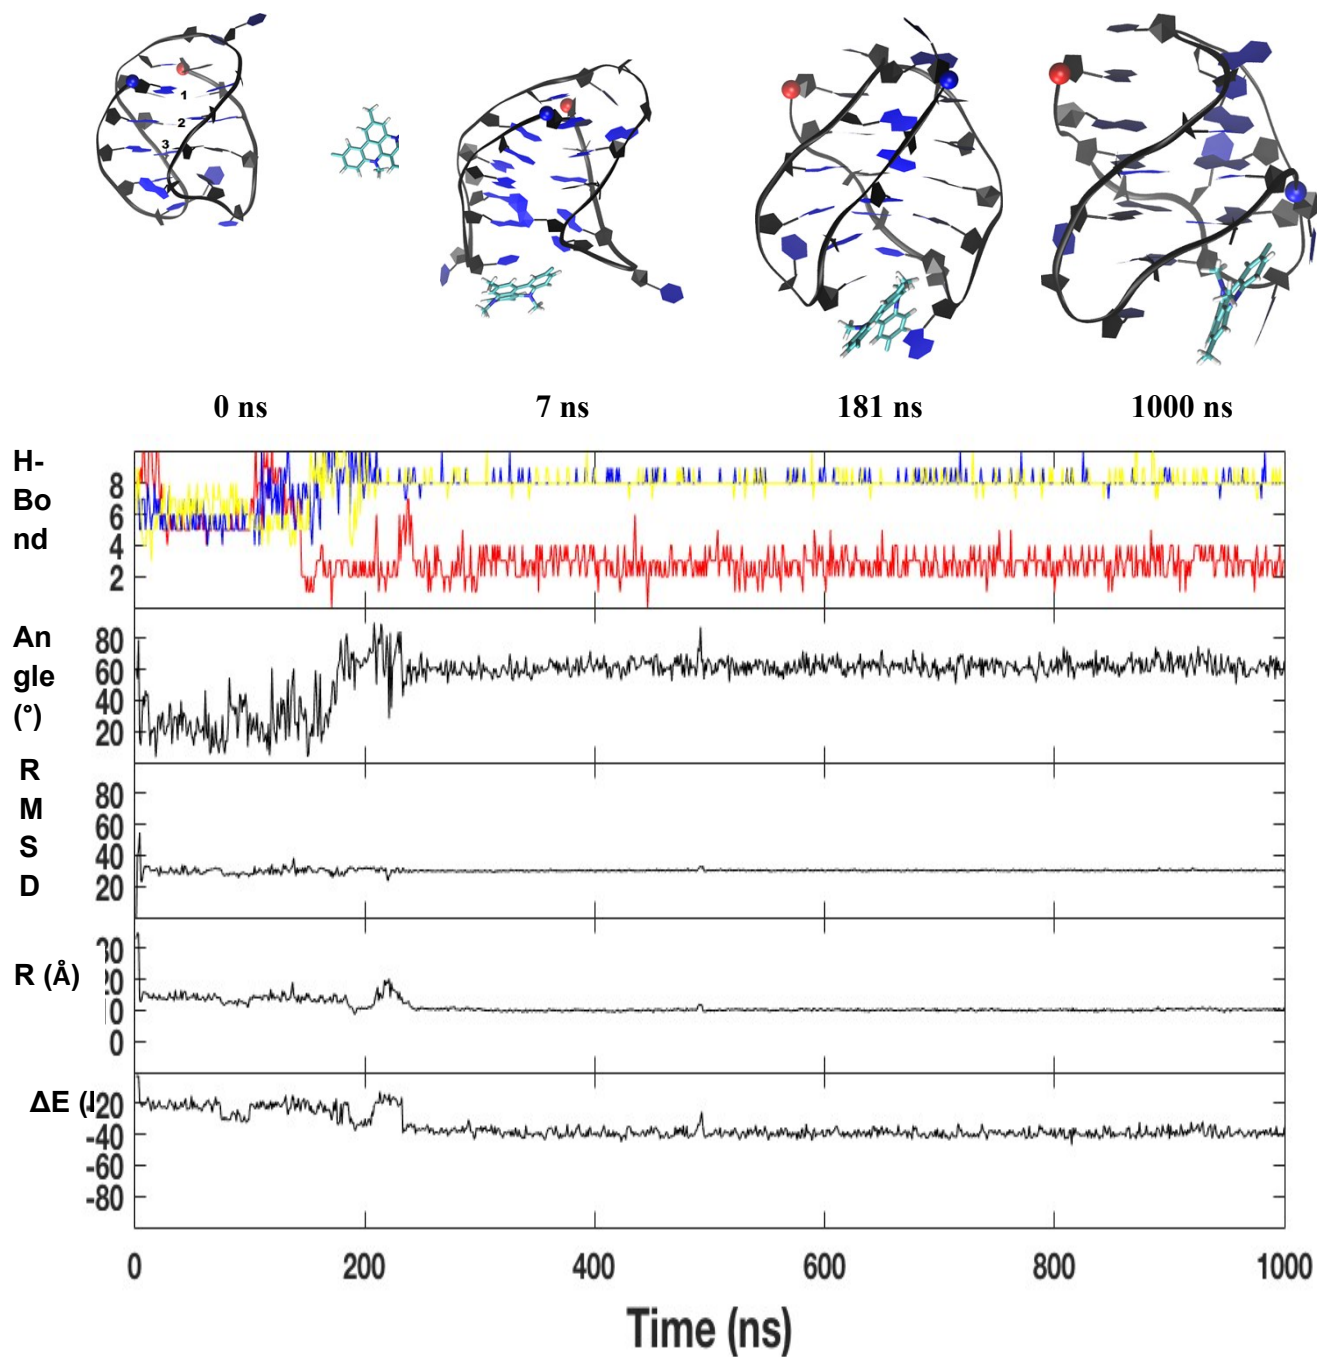

**Figure S25.** A representative trajectory of RHPS4 binding to the side loop of human telomeric antiparallel DNA quadruplex. The order parameter include hydrogen bonds present in first (red), second (blue) and third (yellow) of G-tetrad layer of quadruplex (H-Bond), center-to-center distance (R), the drug-base dihedral angle, ligand RMSD and MM-GBSA binding energy ( $\Delta E$ ). 5' and 3' of the DNA chain are indicated by a red and blue ball, respectively.

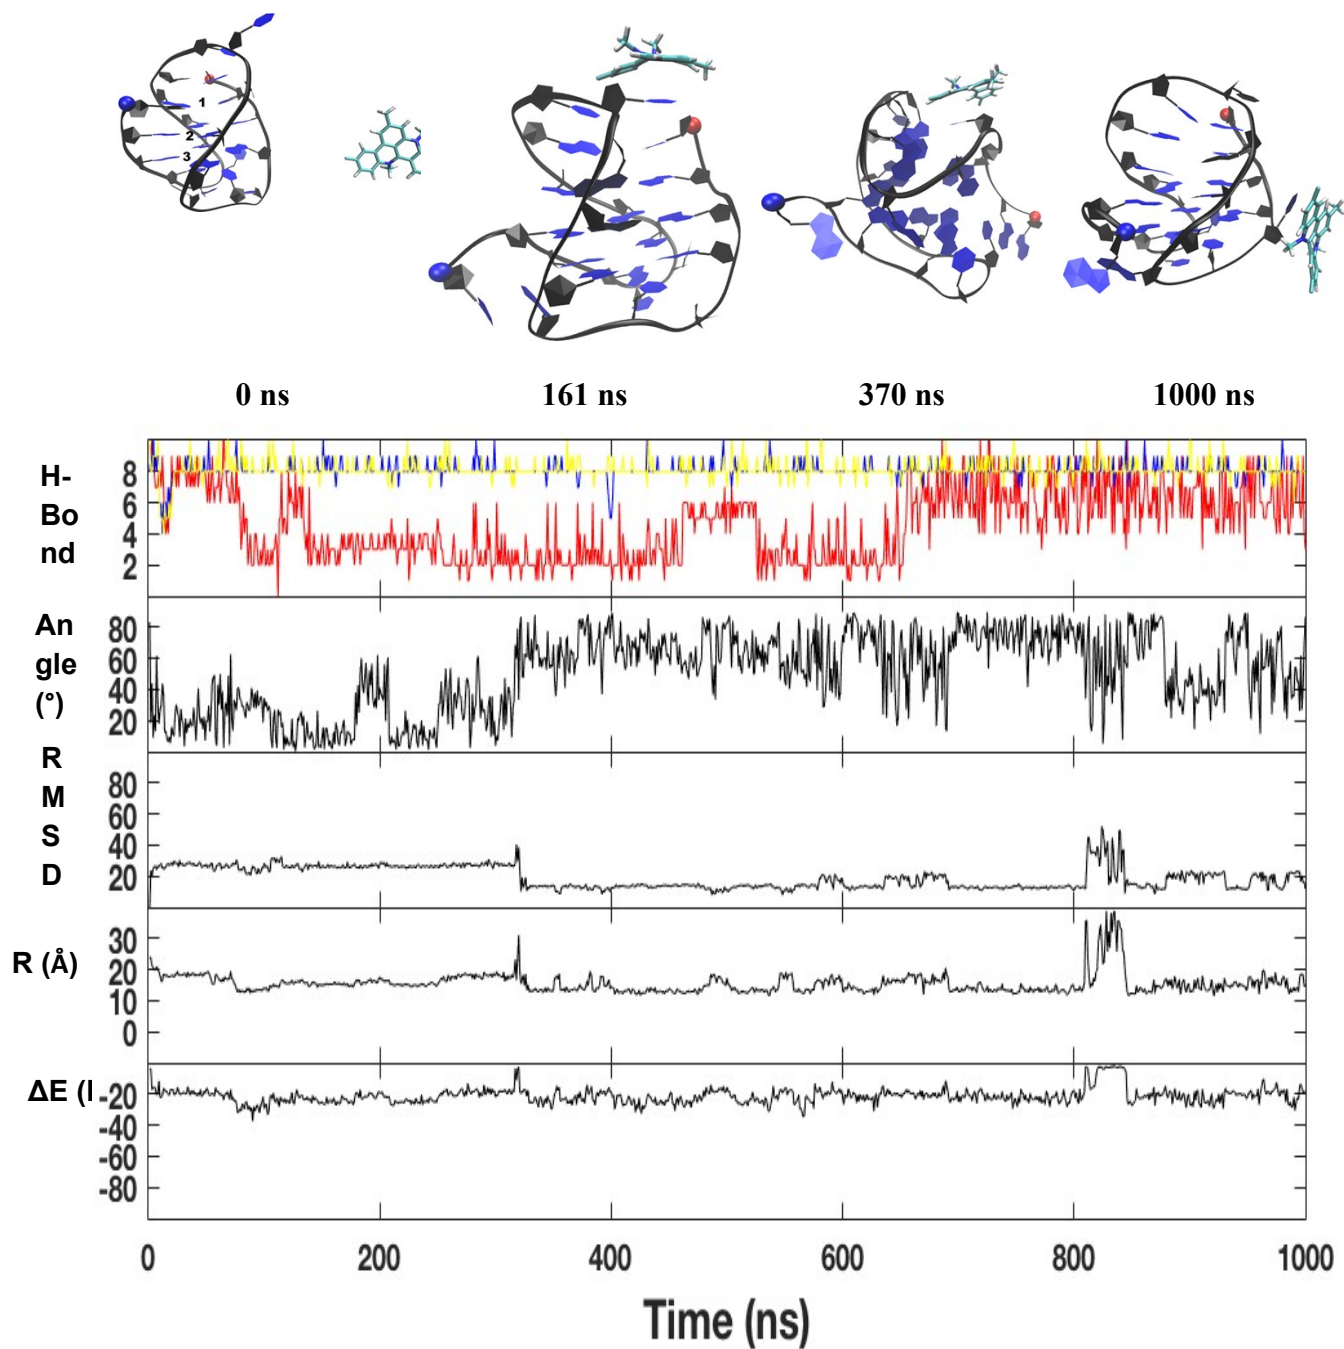

**Figure S26.** A representative trajectory of RHPS4 stacking to the top of human telomeric hybrid DNA quadruplex. The order parameter include hydrogen bonds present in first (red), second (blue) and third (yellow) of G-tetrad layer of quadruplex (H-Bond), center-to-center distance (R), the drug-base dihedral angle, ligand RMSD and MM-GBSA binding energy ( $\Delta E$ ). 5' and 3' of the DNA chain are indicated by a red and blue ball, respectively.

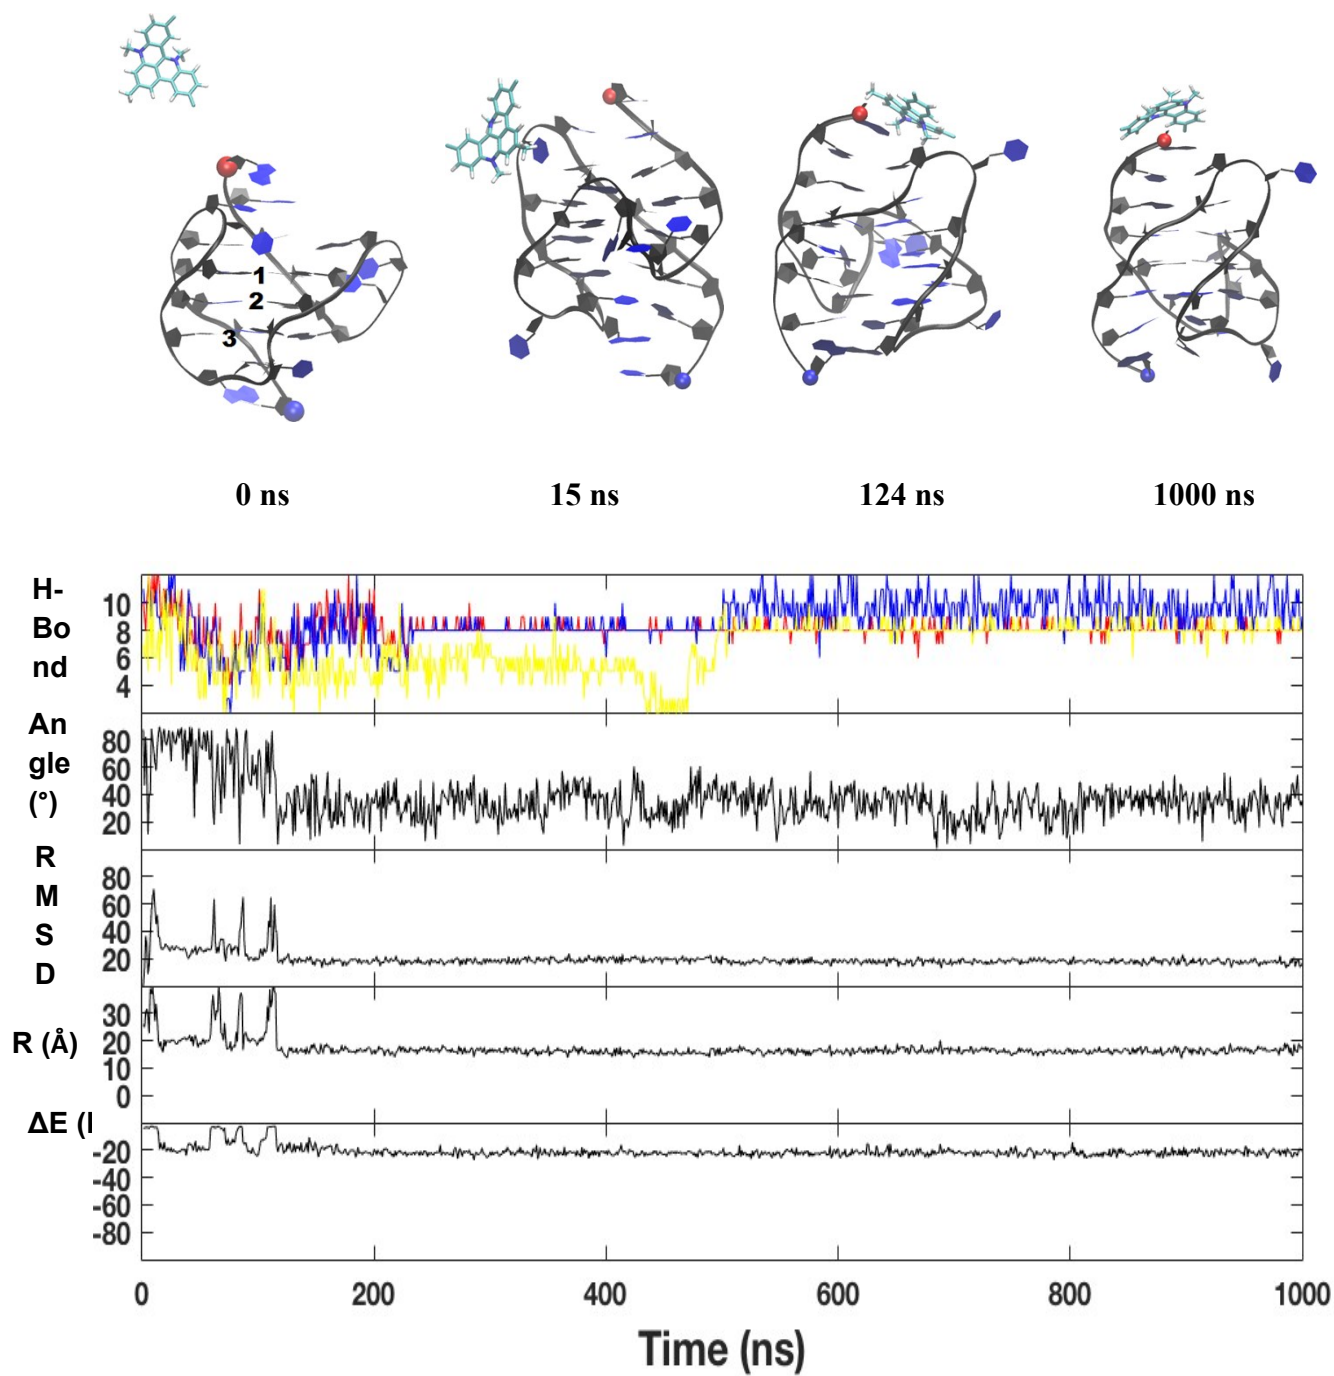

**Figure S27.** A representative trajectory of RHPS4 binding to the side-groove of human telomeric hybrid DNA quadruplex. Center-to-center distance ( $R$ ), the drug-base dihedral angle, ligand RMSD and MM-GBSA binding energy ( $\Delta E$ ). 5' and 3' of the DNA chain are indicated by a red and blue ball, respectively.

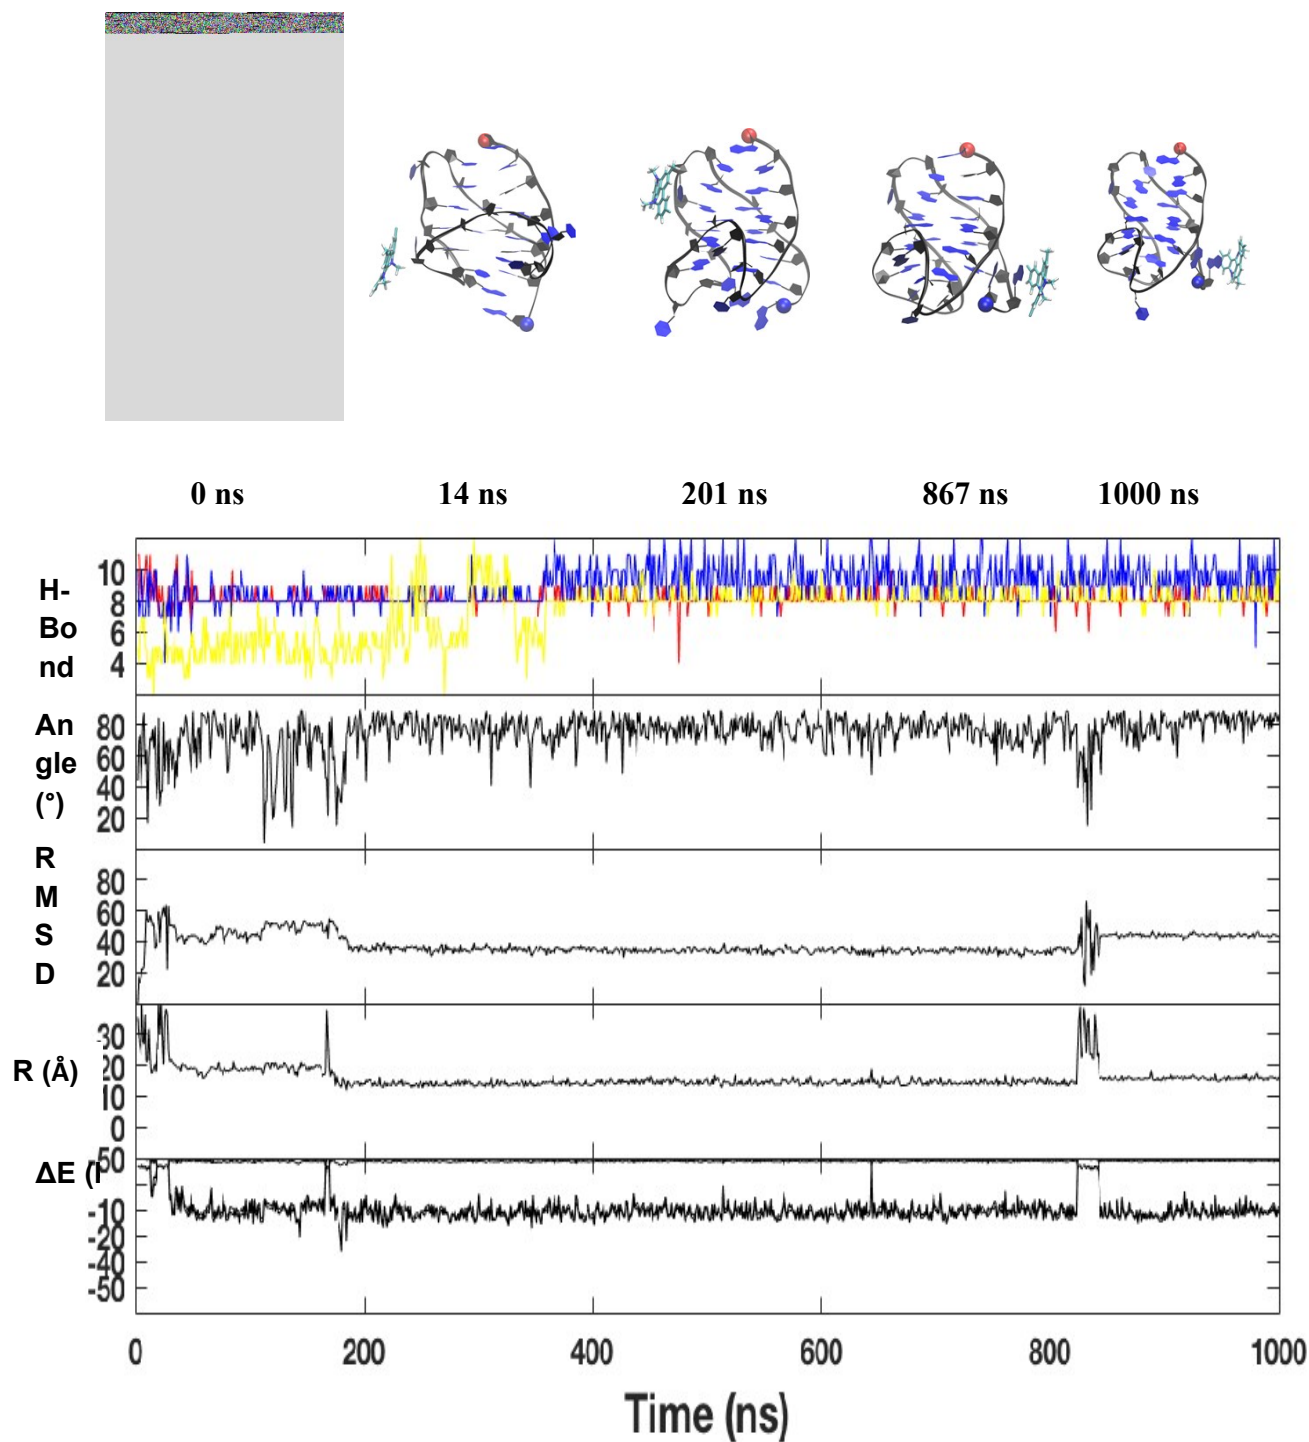

**Figure S28.** AMBER GAFF2 force field of RHPS4 (+1) in Mol2 format.

@<TRIPOS>MOLECULE

LG1

43 47 1 0 1

SMALL

USER\_CHARGES

@<TRIPOS>ATOM

|    |     |           |           |           |   |   |     |           |
|----|-----|-----------|-----------|-----------|---|---|-----|-----------|
| 1  | C05 | -4.633283 | -0.879556 | -0.410733 | C | 1 | LG1 | -0.039648 |
| 2  | H09 | -5.685850 | -0.984618 | -0.594163 | H | 1 | LG1 | 0.169889  |
| 3  | C06 | -4.088818 | 0.338063  | -0.120959 | C | 1 | LG1 | -0.069123 |
| 4  | H10 | -4.730669 | 1.193743  | -0.103335 | H | 1 | LG1 | 0.107580  |
| 5  | C01 | -2.700480 | 0.479750  | 0.085709  | C | 1 | LG1 | -0.012257 |
| 6  | N14 | -2.142871 | 1.723490  | 0.280836  | N | 1 | LG1 | -0.003253 |
| 7  | C13 | -0.798672 | 1.909236  | 0.094583  | C | 1 | LG1 | -0.002912 |
| 8  | C18 | -0.252244 | 3.188724  | -0.025402 | C | 1 | LG1 | -0.058652 |
| 9  | H26 | -0.890076 | 4.047234  | -0.054356 | H | 1 | LG1 | 0.098625  |
| 10 | C17 | 1.110085  | 3.370543  | -0.145221 | C | 1 | LG1 | -0.055059 |
| 11 | C16 | 1.970963  | 2.267576  | -0.134051 | C | 1 | LG1 | -0.058247 |
| 12 | H28 | 3.025862  | 2.443512  | -0.200435 | H | 1 | LG1 | 0.116197  |
| 13 | C15 | 1.475559  | 0.991668  | -0.033717 | C | 1 | LG1 | -0.019249 |
| 14 | C19 | 2.317536  | -0.205373 | -0.032496 | C | 1 | LG1 | -0.025508 |
| 15 | C20 | 3.688499  | -0.152691 | -0.309714 | C | 1 | LG1 | -0.028871 |
| 16 | H29 | 4.175684  | 0.765505  | -0.566568 | H | 1 | LG1 | 0.140390  |
| 17 | C21 | 4.436576  | -1.293739 | -0.268996 | C | 1 | LG1 | -0.003493 |
| 18 | F30 | 5.727948  | -1.230270 | -0.533712 | F | 1 | LG1 | -0.084337 |
| 19 | C22 | 3.873787  | -2.523126 | 0.035187  | C | 1 | LG1 | -0.042024 |
| 20 | H31 | 4.487805  | -3.403137 | 0.046013  | H | 1 | LG1 | 0.153671  |
| 21 | C23 | 2.528662  | -2.589890 | 0.299952  | C | 1 | LG1 | -0.072281 |
| 22 | H32 | 2.097756  | -3.547475 | 0.508451  | H | 1 | LG1 | 0.103667  |
| 23 | C24 | 1.738465  | -1.435703 | 0.268823  | C | 1 | LG1 | -0.019030 |
| 24 | NP5 | 0.348207  | -1.533479 | 0.506008  | N | 1 | LG1 | 0.023646  |
| 25 | C11 | -0.462110 | -0.506249 | 0.228254  | C | 1 | LG1 | 0.073884  |
| 26 | C02 | -1.890072 | -0.663637 | 0.044008  | C | 1 | LG1 | 0.011322  |
| 27 | C03 | -2.470218 | -1.904999 | -0.308057 | C | 1 | LG1 | -0.019154 |
| 28 | H07 | -1.872254 | -2.778425 | -0.457763 | H | 1 | LG1 | 0.117318  |
| 29 | C04 | -3.804487 | -1.996499 | -0.519540 | C | 1 | LG1 | -0.012023 |
| 30 | F08 | -4.340081 | -3.155268 | -0.860380 | F | 1 | LG1 | -0.088658 |
| 31 | C12 | 0.071532  | 0.791445  | 0.064029  | C | 1 | LG1 | 0.046444  |
| 32 | C34 | -0.110828 | -2.699161 | 1.283618  | C | 1 | LG1 | -0.000787 |



|        |           |           |             |       |           |
|--------|-----------|-----------|-------------|-------|-----------|
| 33 H35 | 0.594764  | -2.858288 | 2.084924 H  | 1 LG1 | 0.070118  |
| 34 H36 | -1.072647 | -2.489904 | 1.716164 H  | 1 LG1 | 0.070118  |
| 35 H37 | -0.171204 | -3.592102 | 0.678483 H  | 1 LG1 | 0.070118  |
| 36 C27 | 1.688665  | 4.754603  | -0.292167 C | 1 LG1 | -0.022544 |
| 37 H38 | 2.401816  | 4.951947  | 0.501035 H  | 1 LG1 | 0.053165  |
| 38 H39 | 0.921182  | 5.516146  | -0.256793 H | 1 LG1 | 0.053165  |
| 39 H40 | 2.214743  | 4.844969  | -1.236584 H | 1 LG1 | 0.053165  |
| 40 C33 | -2.991755 | 2.859435  | 0.646868 C  | 1 LG1 | -0.008669 |
| 41 H41 | -3.357953 | 3.385684  | -0.226369 H | 1 LG1 | 0.071099  |
| 42 H42 | -3.823513 | 2.506508  | 1.233227 H  | 1 LG1 | 0.071099  |
| 43 H43 | -2.427791 | 3.535943  | 1.267122 H  | 1 LG1 | 0.071099  |

@<TRIPOS>BOND

|    |    |      |
|----|----|------|
| 1  | 1  | 2 1  |
| 2  | 1  | 3 1  |
| 3  | 1  | 29 1 |
| 4  | 3  | 4 1  |
| 5  | 3  | 5 1  |
| 6  | 5  | 6 1  |
| 7  | 5  | 26 1 |
| 8  | 6  | 7 1  |
| 9  | 6  | 40 1 |
| 10 | 7  | 8 1  |
| 11 | 7  | 31 1 |
| 12 | 8  | 9 1  |
| 13 | 8  | 10 1 |
| 14 | 10 | 11 1 |
| 15 | 10 | 36 1 |
| 16 | 11 | 12 1 |
| 17 | 11 | 13 1 |
| 18 | 13 | 14 1 |
| 19 | 13 | 31 1 |
| 20 | 14 | 15 1 |
| 21 | 14 | 23 1 |
| 22 | 15 | 16 1 |
| 23 | 15 | 17 1 |
| 24 | 17 | 18 1 |
| 25 | 17 | 19 1 |
| 26 | 19 | 20 1 |
| 27 | 19 | 21 1 |
| 28 | 21 | 22 1 |

29 21 23 1  
30 23 24 1  
31 24 25 1  
32 24 32 1  
33 25 26 1  
34 25 31 1  
35 26 27 1  
36 27 28 1  
37 27 29 1  
38 29 30 1  
39 32 33 1  
40 32 34 1  
41 32 35 1  
42 36 37 1  
43 36 38 1  
44 36 39 1  
45 40 41 1  
46 40 42 1  
47 40 43 1

@<TRIPOS>SUBSTRUCTURE

1 LG1 1 0
